1 **Title**

2 Describing a complex primary health care population in a learning health system to support  
3 future decision support and artificial intelligence initiatives  
4

5 **Authors**

6 Jacqueline K. Kueper MSc,<sup>1,2</sup> Jennifer Rayner PhD,<sup>3,4</sup> Merrick Zwarenstein MBBCh,PhD,<sup>1,3</sup>  
7 Daniel J. Lizotte PhD,<sup>1,2</sup>

- 8 1. Department of Epidemiology and Biostatistics, Schulich School of Medicine & Dentistry,  
9 Western University, London, Ontario, Canada, N6G 2M1  
10 2. Department of Computer Science, Faculty of Science, Western University, London,  
11 Ontario, Canada, N6A 5B7  
12 3. Department of Family Medicine, Schulich School of Medicine & Dentistry, Western  
13 University, London, Ontario, Canada, N6G 2M1  
14 4. Alliance for Healthier Communities, Toronto, Ontario, Canada, M6A 3B6  
15

16 **Corresponding author:**

17 Jacqueline K. Kueper  
18 [jkueper@uwo.ca](mailto:jkueper@uwo.ca)  
19  
20

21 **Word Count:** 3,782

22 **Figure Count:** 4

23 **Table Count:** 2  
24  
25

## 26 ABSTRACT

27  
28 **Introduction:** Learning health systems (LHS) use data to improve care. Descriptive  
29 epidemiology to reveal health states and needs of the LHS population is essential for informing  
30 LHS initiatives, including development of decision support tools. To properly characterize  
31 complex populations, both simple statistical and artificial intelligence techniques can be useful.  
32 We present the first large-scale description of the population served by one of the first primary  
33 care LHS in North America.

34  
35 **Objectives:** Our objective is to describe sociodemographic, clinical, and health care use  
36 characteristics of adult primary care clients served by the Alliance for Healthier Communities,  
37 which provides team-based primary health care through Community Health Centres (CHCs)  
38 across Ontario, Canada.

39  
40 **Methods:** Using electronic health record data from 2009-2019 for all CHCs, we perform table-  
41 based summaries for each characteristic; and apply unsupervised learning techniques to explore  
42 patterns of common condition co-occurrence, care provider teams, and care frequency.

43  
44 **Results:** Of the 221,047 eligible clients, those at CHCs that primarily serve those most at risk  
45 (homeless, mental health, addictions) tend to have more chronic conditions and social  
46 determinants of health, which are also prominent in clients with multimorbidity. Most care is  
47 provided by physician and nursing providers, with heterogeneous combinations of other provider  
48 types. A subset of clients have many issues addressed within single-visits and there is within- and  
49 between-client variability in care frequency. Example methodological considerations learned for  
50 future LHS initiatives include the need to carefully consider the level of analysis and associated  
51 implications for data quality and target population, heterogeneity in conditions and care  
52 characteristics, and non-uniform risk profiles across the care history.

53  
54 **Conclusions:** We demonstrate the use of methods from statistics and artificial intelligence,  
55 applied with an epidemiological lens, to provide an overview of a complex primary care  
56 population. In addition to substantive findings, we discuss implications for future LHS initiatives.

## 57 58 **Keywords**

59 Learning Health System, Primary Health Care, Epidemiology, Artificial Intelligence,  
60 Unsupervised Machine Learning

61  
62

## 63 Introduction

64 The recognized potential for analysis of electronic health record (EHR) data to inform health care  
65 delivery led to the formalization of the concept of a Learning Health System (LHS) in 2007: a  
66 socio-technical system characterized by iterative cycles of data-to-knowledge-to-practice  
67 feedback [1, 2]. LHS initiatives target quality improvement, research, or decision support; and  
68 usually rely on EHR data from the same population that the findings or end-product are intended  
69 to benefit [2–5]. These initiatives can support populations who have historically been excluded  
70 from medical research and clinical guideline development, such as those with complex health  
71 needs or barriers to participation [6–9].

72  
73 Primary care, first contact care provided in a community setting over the life course, is inherently  
74 complex [10, 11]. The Alliance for Healthier Communities provides team-based primary health  
75 care through 72 Community Health Centres (CHCs) across Ontario to clients who face barriers to  
76 care and challenges, such as poverty and mental illness, that increase their risk for poor health  
77 [12–14]. Population health is a central element of their care model, and the Alliance officially  
78 adopted a LHS model in October 2020 [15, 16], making them one of few documented primary  
79 care LHSs in North America [5].

80  
81 A LHS may pursue multiple initiatives to inform and improve care delivery. A first step towards  
82 any initiative is identifying needs of clients and providers, which is often driven by internal  
83 stakeholders [4]. Descriptive epidemiology is instrumental in outlining health states and needs of  
84 populations [17], and may be beneficial to add into these early stages of LHS development both  
85 to identify new areas to explore and to support existing ideas. For example, describing how  
86 clients are represented in EHR data at a population level may complement clinical experience to  
87 identify potential bias or misrepresentation that analyses need to account for to obtain meaningful  
88 results [18–20]. In addition to proposed LHS benefits, descriptive studies can contribute towards  
89 closing the gap in understanding about the basic functions of primary care in general [21].

90  
91 To properly understand complex EHR data, we propose using both simple statistical techniques  
92 traditionally used in descriptive epidemiology and more complex techniques from artificial  
93 intelligence, applied with an epidemiological lens. Simple techniques alone may provide an  
94 oversimplified or incorrect view of certain characteristics, which could lead to ineffective or  
95 harmful decisions later-on. So, in pursuing our primary purpose of better understanding care  
96 provided by the Alliance, we explore the suitability of a variety of techniques for epidemiology  
97 of a separate primary care system with its own EHR.

98  
99 We present the first large-scale descriptive and exploratory study of ongoing primary care clients  
100 served by the Alliance using statistical and machine learning methodology. Our *objective* is to  
101 summarize sociodemographic, clinical, and health care use characteristics of this population. We  
102 use unsupervised learning techniques to identify patterns of multimorbidity, care provider teams,  
103 and care access frequency. Findings will provide a foundation for future Alliance LHS initiatives,  
104 including those related to their existing interest in using EHR data to segment populations and  
105 tailor care. In addition to substantive findings, this work more generally demonstrates the  
106 application of an epidemiological lens and use of a variety of methods from statistics and  
107 artificial intelligence to effectively describe a complex population and contribute to early stages  
108 of a LHS.

109

## 110 **Methods**

### 111 **Study population and data source**

112 We use a de-identified extract of the centralized, structured EHR database from all CHCs; clients  
113 have unique identifiers to allow tracking of care over time. Issues addressed during care are  
114 recorded using Electronic Nomenclature and Classification Of Disorders and Encounters for  
115 Family Medicine (ENCODE-FM) [22] and International Classification of Disease (ICD)-10  
116 vocabularies [23]. Primary care EHRs represent an open cohort; Supplementary Appendix 1  
117 (Figure S1) shows the cohort size along calendar- and observation-based time definitions. Clients  
118 eligible for inclusion were over 18 years old in 2009, indicated a CHC as their primary care  
119 provider, and had at least one encounter at a CHC in 2009 to 2019. Any additional eligibility for  
120 specific analyses is described as needed below. We follow RECORD reporting guidelines  
121 (Supplementary Appendix 2)[24].  
122

122

### 123 **General analysis plan**

124 Sociodemographic, clinical, and health care use characteristics are defined in Supplementary  
125 Appendix 3 (Table S1). Methods specific to each category are described below; we perform  
126 “table-based summaries” for all, whereby categorical variables are summarized by counts and  
127 percentages, and continuous variables by the range, median, mean, and standard deviation. Where  
128 specified, findings are stratified by client multimorbidity status (defined below) or CHC “urban  
129 at-risk” (UAR) status, which are CHCs located in major urban geographical areas and serve  
130 priority populations defined by homelessness and/or mental health and substance use challenges  
131 [25]. CHCs without UAR designation still focus on clients with barriers to care but may be in  
132 rural or urban settings and do not solely serve clients with the aforementioned complexities [25].  
133

133

### 134 **Sociodemographic characteristics**

135 We provide table-based summaries for select fields from the structured EHR client characteristic  
136 table and certain ENCODE-FM-derived variables. Missingness of the former occurs at the 1)  
137 CHC or provider level, whereby a client is not asked about the characteristic and 2) client level,  
138 whereby a client is asked and preferred to not respond. Results are presented overall and stratified  
139 by UAR and multimorbidity status.  
140

140

### 141 **Clinical characteristics**

142 We describe 20 chronic conditions that define multimorbidity in PC research [26–28] and an  
143 additional four conditions of interest identified by Alliance stakeholders. For each condition,  
144 clients are assumed to receive related care upon the first record of a relevant code. Conditions are  
145 explored in single, composite, and pairwise manners.  
146

146

### 147 **Prevalence and incidence**

148 To provide different perspectives on clinical complexity, we calculate two measures of  
149 prevalence and one measure of incidence for each of the 24 conditions. We also calculate  
150 prevalence of multimorbidity. Our primary multimorbidity definition, including for stratification,

151 is presence of at least three of the 20 chronic conditions [26–28]. Multimorbidity of at least two  
152 conditions is also common and is presented for comparison [27].

- 153 1) *Eleven-year period prevalence*, based on calendar time, to assess the burden of conditions  
154 over the entire observation period (2009-2019). For each condition, the number of clients  
155 who ever receive a condition indication is divided by an estimate of the average  
156 population size (technical details in Supplementary Appendix 3). Sensitivity analyses  
157 include the largest possible denominator: total number of eligible clients, and the smallest  
158 reasonable denominator: starting with the middle calendar year (2014), additional clients  
159 with at least one visit in adjacent years are added until no prevalence estimate is over  
160 100%. Results are shown overall and UAR-stratified.
- 161 2) *Observation-based period prevalence*, based on length of client observation, to assess the  
162 burden of conditions dependent on the number of years clients have received care at a  
163 CHC. To calculate this, clients are separated into 11 sub-cohorts based on the number of  
164 years (consecutive 365.25 day intervals, rounded up) between their first and last recorded  
165 events. For each sub-cohort and condition, the number of clients who ever receive a  
166 condition indication is divided by the number of clients in the sub-cohort. Results are  
167 presented as bar graphs.
- 168 3) *Cumulative incidence*, to assess the rate of condition indications by days of observation.  
169 Cumulative incidence curves are plotted using the R package *survival* [29]. To prioritize  
170 capture of incident condition-related care, clients with conditions recorded in 2009 are  
171 excluded from this analysis.

172  
173 **Condition co-occurrence patterns**  
174 To assess co-occurrence for each pair of conditions while adjusting for all of the other conditions,  
175 we estimate an *Ising model* using R package *MRFcov* [30, 31] for all conditions except Hepatitis  
176 C (Alliance-suggested condition that overlaps with one of the 20 chronic conditions). We convert  
177 coefficients, representing the strength of association between each condition pair adjusted for all  
178 other conditions, to odds ratios and interpret size using Chen et al. (2010) guidelines [32]. We  
179 also view the top frequency-based co-occurrences.

## 180 181 **Health care use characteristics**

182 We perform table-based summaries of provider and care access characteristics overall and  
183 stratified by UAR CHC, Rural Geography CHC, and client multimorbidity status.

184  
185 **Providers involved**  
186 To identify common care provider teams that clients are exposed to across their care histories, we  
187 use *non-negative matrix factorization (NMF)*[33] to identify frequently-occurring: 1) “*Ever-*  
188 *seen*” teams whereby dummy variables are used to indicate whether each provider type has ever  
189 been involved in care, and 2) *Relative “amount-seen” teams* based on volume of care whereby  
190 the number of events associated with each provider type are normalized within clients. For each  
191 version, analyses allowing 2,3,5,10, and 15 topics (provider teams) are run with the Python  
192 package *sklearn.decomposition.NMF* and the kullback-Leibler divergence distance metric [34].  
193 Resulting topics are interpreted manually. Provider types are maintained as recorded in the EHR  
194 except “Other,” “Unknown,” and “Undefined” are combined. We also summarize the top  
195 frequency-based provider types involved in care and referrals. Eligible clients require at least one  
196 provider type indication in their EHR.

197  
 198 **Care access patterns**  
 199 *Complexity of care* is measured as the number of events (distinct issues addressed or types of care  
 200 received) per visit (calendar day of access) to a CHC. *Care frequency* is measured as the number  
 201 of calendar days at least one event is recorded per year (365.25 day intervals) and per quarter-  
 202 year (90.30 day intervals). To investigate frequency of care in terms of magnitude and shape  
 203 (changes in magnitude across care histories), we perform *time series clustering* with the K  
 204 Medoids algorithm and dynamic time warping distance metric [35] for 1) *short-term clients* with  
 205 2-3 observation years and 2) *long-term clients* with 8-10 observation years. For each time interval  
 206 and cohort, R package *dtwclust* [36] is used to identify 2,3,4, and 5 clusters. Performance is  
 207 assessed using the silhouette score and visual inspection.

## 209 Results

210 There are 221 047 eligible clients (Supplementary Appendix 3), of whom 64 504 (29.18%)  
 211 received care at least once in 2009, 141 627 (64.07%) in 2019, and 40 704 (18.4%) received care  
 212 in both years.

## 214 Sociodemographic characteristics

215 Sociodemographic characteristics are described in **Table 1**, with remaining sub-strata in  
 216 Supplementary Appendix 3 Table S2. The UAR CHCs tend to provide care to clients who are  
 217 more commonly male, English-speaking, and have lower levels of education, household income,  
 218 immigration, stable housing, and/or food security. Clients with multimorbidity tend to be older  
 219 and more commonly female, reside in rural locations, and have lower levels of education,  
 220 immigration, stable residence, and/or food security.

221  
 222 **Table 1: Sociodemographic characteristics**

| Characteristic    | Values  | All Clients<br>n (%) | Urban at Risk<br>CHC <sup>a</sup><br>n (%) | Multimorbidity<br>n (%) |
|-------------------|---------|----------------------|--------------------------------------------|-------------------------|
| Number of clients |         | 221 047              | 35 998                                     | 103 172                 |
| Age in 2015       | 25-34   | 55 505 (25.11)       | 7976 (22.16)                               | 9346 (9.06)             |
|                   | 35-44   | 45 646 (20.65)       | 7540 (20.95)                               | 15 542 (15.06)          |
|                   | 45-54   | 44 653 (20.2)        | 8186 (22.74)                               | 23 982 (23.24)          |
|                   | 55-64   | 37 848 (17.12)       | 6790 (18.86)                               | 25 578 (24.79)          |
|                   | 65-74   | 23 162 (10.48)       | 3644 (10.12)                               | 17 780 (17.23)          |
|                   | 75+     | 14 233 (6.44)        | 1862 (5.17)                                | 10 944 (10.61)          |
| Geography         | Rural   | 49 275 (22.29)       | 6131 (17.03)                               | 26 818 (25.99)          |
|                   | Urban   | 167 728 (75.88)      | 28 538 (79.28)                             | 75 011 (72.70)          |
|                   | Missing | 4044 (1.83)          | 1329 (3.69)                                | 1343 (1.30)             |
| Sex               | Female  | 127 070 (57.49)      | 18 699 (51.94)                             | 59 946 (58.10)          |



|                            |                              |                 |                |                |
|----------------------------|------------------------------|-----------------|----------------|----------------|
| Gender                     | Male                         | 93 294 (42.21)  | 17 151 (47.64) | 43 124 (41.80) |
|                            | Other                        | 331 (0.15)      | 43 (0.12)      | 19 (0.02)      |
|                            | Missing                      | 352 (0.16)      | 105 (0.29)     | 83 (0.08)      |
|                            | Female                       | 41 352 (18.71)  | 5509 (15.30)   | 21 831 (21.16) |
|                            | Gender diverse               | 340 (0.15)      | 112 (0.31)     | 144 (0.14)     |
|                            | Male                         | 29 366 (13.28)  | 4585 (12.74)   | 14 733 (14.28) |
| Sexual Orientation         | Prefer not to answer         | 1001 (0.45)     | 51 (0.14)      | 376 (0.36)     |
|                            | Missing                      | 148 988 (67.4)  | 25 741 (71.51) | 66 088 (64.06) |
|                            | Bisexual                     | 1578 (0.71)     | 285 (0.79)     | 690 (0.67)     |
|                            | Gay                          | 708 (0.32)      | 192 (0.53)     | 306 (0.30)     |
|                            | Heterosexual                 | 57 065 (25.82)  | 8447 (23.47)   | 29 105 (28.21) |
|                            | Lesbian                      | 485 (0.22)      | 70 (0.19)      | 244 (0.24)     |
|                            | Queer                        | 323 (0.15)      | 34 (0.09)      | 91 (0.09)      |
|                            | Two-Spirit                   | 128 (0.06)      | 80 (0.22)      | 61 (0.06)      |
|                            | Other                        | 246 (0.11)      | 34 (0.09)      | 143 (0.14)     |
|                            | Do not know                  | 924 (0.42)      | 201 (0.56)     | 485 (0.47)     |
|                            | Prefer not to answer         | 7561 (3.42)     | 877 (2.44)     | 4078 (3.95)    |
|                            | Missing                      | 152 029 (68.78) | 25 778 (71.61) | 67 969 (65.88) |
| Highest Level of Education | Post-secondary or equivalent | 84 888 (38.4)   | 12 056 (33.49) | 35 763 (34.66) |
|                            | Secondary or equivalent      | 61 831 (27.97)  | 11 783 (32.73) | 32 617 (31.61) |
|                            | Less than high school        | 18 941 (8.57)   | 3266 (9.07)    | 10 618 (10.29) |
|                            | Other                        | 8507 (3.85)     | 719 (2.00)     | 4078 (3.95)    |
|                            | Do not know                  | 4860 (2.20)     | 1318 (3.66)    | 2350 (2.28)    |
|                            | Prefer not to answer         | 2950 (1.33)     | 422 (1.17)     | 1585 (1.54)    |
|                            | Missing                      | 39 070 (17.67)  | 6434 (17.87)   | 16 161 (15.66) |
| Primary Language           | English                      | 167 163 (75.62) | 31 658 (87.94) | 79 599 (77.15) |
|                            | French                       | 22 547 (10.20)  | 944 (2.62)     | 11 091 (10.75) |
|                            | Other                        | 26 847 (12.15)  | 2948 (8.19)    | 10 710 (10.38) |
|                            | Missing                      | 4490 (2.03)     | 448 (1.24)     | 1772 (1.72)    |
|                            | Race and Ethnicity           | Black           | 8861 (4.01)    | 725 (2.01)     |
| East/Southeast Asian       |                              | 3739 (1.69)     | 484 (1.34)     | 1545 (1.50)    |

|                               |                                   |                 |                |                |
|-------------------------------|-----------------------------------|-----------------|----------------|----------------|
|                               | Indigenous                        | 2944 (1.33)     | 1577 (4.38)    | 1641 (1.59)    |
|                               | Latino                            | 4350 (1.97)     | 206 (0.57)     | 1708 (1.66)    |
|                               | Middle Eastern                    | 2046 (0.93)     | 344 (0.96)     | 838 (0.81)     |
|                               | Other                             | 567 (0.26)      | 148 (0.41)     | 306 (0.30)     |
|                               | South Asian                       | 3597 (1.63)     | 323 (0.90)     | 1852 (1.80)    |
|                               | White                             | 38 464 (17.4)   | 4531 (12.59)   | 21 504 (20.84) |
|                               | Do not know                       | 838 (0.38)      | 151 (0.42)     | 487 (0.47)     |
|                               | Prefer not to answer              | 2649 (1.20)     | 261 (0.73)     | 1513 (1.47)    |
|                               | Missing                           | 152 992 (69.21) | 27 248 (75.69) | 68 021 (65.93) |
| Years Since Arrival in Canada | 0to5yr                            | 13 654 (6.18)   | 1191 (3.31)    | 3047 (2.95)    |
|                               | 6+                                | 51 815 (23.44)  | 4940 (13.72)   | 22 722 (22.02) |
|                               | None recorded                     | 155 578 (70.38) | 29 867 (82.97) | 77 403 (75.02) |
|                               |                                   |                 |                |                |
| Household Income              | \$0 to \$14,999                   | 40 519 (18.33)  | 8729 (24.25)   | 17 757 (17.21) |
|                               | \$15,000 to \$24,999              | 21 102 (9.55)   | 3555 (9.88)    | 11 081 (10.74) |
|                               | \$25,000 to \$39,999              | 20 877 (9.44)   | 2988 (8.30)    | 10 736 (10.41) |
|                               | \$40,000 to \$59,999              | 17 245 (7.80)   | 2421 (6.73)    | 8671 (8.40)    |
|                               | \$60,000 or more                  | 28 494 (12.89)  | 3862 (10.73)   | 12 868 (12.47) |
|                               | Do not know                       | 15 408 (6.97)   | 2658 (7.38)    | 6264 (6.07)    |
|                               | Prefer not to answer              | 27 621 (12.50)  | 4130 (11.47)   | 14 890 (14.43) |
|                               | Missing                           | 49 781 (22.52)  | 7655 (21.27)   | 20 905 (20.26) |
| Household Composition         | Couple with children              | 53 398 (24.16)  | 6759 (18.78)   | 20 713 (20.08) |
|                               | Couple without child              | 39 664 (17.94)  | 5945 (16.51)   | 22 950 (22.24) |
|                               | Extended family                   | 7632 (3.45)     | 1123 (3.12)    | 3581 (3.47)    |
|                               | Grandparents with grandchild(ren) | 1746 (0.79)     | 247 (0.69)     | 1183 (1.15)    |
|                               | Siblings                          | 1622 (0.73)     | 250 (0.69)     | 669 (0.65)     |
|                               | Single parent                     | 14 445 (6.53)   | 2527 (7.02)    | 6348 (6.15)    |
|                               | Sole member                       | 32 782 (14.83)  | 7445 (20.68)   | 18 597 (18.03) |
|                               | Unrelated                         | 8622 (3.90)     | 1567 (4.35)    | 2849 (2.76)    |
|                               |                                   |                 |                |                |



|                  |                      |                 |                |                |
|------------------|----------------------|-----------------|----------------|----------------|
|                  | housemates           |                 |                |                |
|                  | Other                | 8913 (4.03)     | 1476 (4.10)    | 4202 (4.07)    |
|                  | Do not know          | 2475 (1.12)     | 643 (1.79)     | 1279 (1.24)    |
|                  | Prefer not to answer | 3727 (1.69)     | 491 (1.36)     | 1927 (1.87)    |
|                  | Missing              | 46 021 (20.82)  | 7525 (20.90)   | 18 874 (18.29) |
| Stable Residence | True                 | 199 349 (90.18) | 28 227 (78.41) | 90 479 (87.70) |
| Food Insecurity  | True                 | 10 985 (4.97)   | 2947 (8.19)    | 7323 (7.10)    |

223 <sup>a</sup>CHC = Community Health Centre.

224

225

## 226 Clinical characteristics

### 227 Prevalence and incidence

228 *Eleven-year period prevalence* estimates range from 1.48% (Hepatitis C) to 80.97%  
 229 (multimorbidity of two conditions) overall, with generally higher estimates in UAR strata (**Table**  
 230 **2**). The low sensitivity estimate for the denominator is based on 2012-2015 (n=148 595).

231

### 232 Table 2: Eleven-year period prevalence

| Condition                                         | All Clients<br>n (%) | Urban at Risk CHC <sup>a</sup><br>n (%) |
|---------------------------------------------------|----------------------|-----------------------------------------|
| Denominator <sup>b</sup>                          | 165 125              | 27 256                                  |
| Hypertension                                      | 68 177 (41.29)       | 12 304 (45.14)                          |
| Depression or anxiety                             | 23 828 (14.43)       | 5533 (20.30)                            |
| Chronic musculoskeletal                           | 104 304 (63.17)      | 18 842 (69.13)                          |
| Arthritis                                         | 37 201 (22.53)       | 6906 (25.34)                            |
| Osteoporosis                                      | 11 462 (6.94)        | 1950 (7.15)                             |
| Asthma or COPD <sup>c</sup> or chronic bronchitis | 43 837 (26.55)       | 9190 (33.72)                            |
| Cardiovascular disease                            | 23 311 (14.12)       | 4673 (17.14)                            |
| Heart failure                                     | 7994 (4.84)          | 1564 (5.74)                             |
| Stroke or TIA <sup>d</sup>                        | 2967 (1.80)          | 585 (2.15)                              |
| Stomach problem                                   | 36 175 (21.91)       | 7620 (27.96)                            |
| Colon problem                                     | 24 949 (15.11)       | 4974 (18.25)                            |
| Chronic hepatitis                                 | 13 288 (8.05)        | 2954 (10.84)                            |
| Diabetes                                          | 35 704 (21.62)       | 6912 (25.36)                            |
| Thyroid disorder                                  | 24 793 (15.01)       | 4217 (15.47)                            |
| Any cancer                                        | 14 024 (8.49)        | 2636 (9.67)                             |
| Kidney disease or failure                         | 8290 (5.02)          | 1555 (5.71)                             |
| Chronic urinary problem                           | 59 677 (36.14)       | 11 131 (40.84)                          |

|                                 |                 |                |
|---------------------------------|-----------------|----------------|
| Dementia or Alzheimer's disease | 4776 (2.89)     | 898 (3.29)     |
| Hyperlipidemia                  | 67 175 (40.68)  | 11 659 (42.78) |
| Obesity                         | 38 408 (23.26)  | 6455 (23.68)   |
| Hepatitis C                     | 2436 (1.48)     | 1173 (4.30)    |
| Smoking or tobacco use          | 37 355 (22.62)  | 9597 (35.21)   |
| Substance use                   | 20 853 (12.63)  | 7508 (27.55)   |
| Lonely or isolated              | 17 947 (10.87)  | 5149 (18.89)   |
| Multimorbidity 2+               | 133 704 (80.97) | 24 129 (88.53) |
| Multimorbidity 3+               | 103 172 (62.48) | 19 237 (70.58) |

233 <sup>a</sup>*CHC = Community Health Centre*

234 <sup>b</sup>*Denominator is the approximated average population size across all years (2009-2019)*

235 <sup>c</sup>*COPD = Chronic Obstructive Pulmonary Disease*

236 <sup>d</sup>*TIA = Transient Ischemic Attack*

237  
238 *Observation-based period prevalence estimates tend to increase with length of observation;*  
239 *however, cumulative incidence plots for the 156 543 (70.82%) clients without care recorded in*  
240 *2009 show the rate of condition indications notably decreases after the first year of observation.*  
241 *Sample plots are in **Figure 1**; all are in Supplementary Appendix 1 (Figure S2 and S3).*  
242

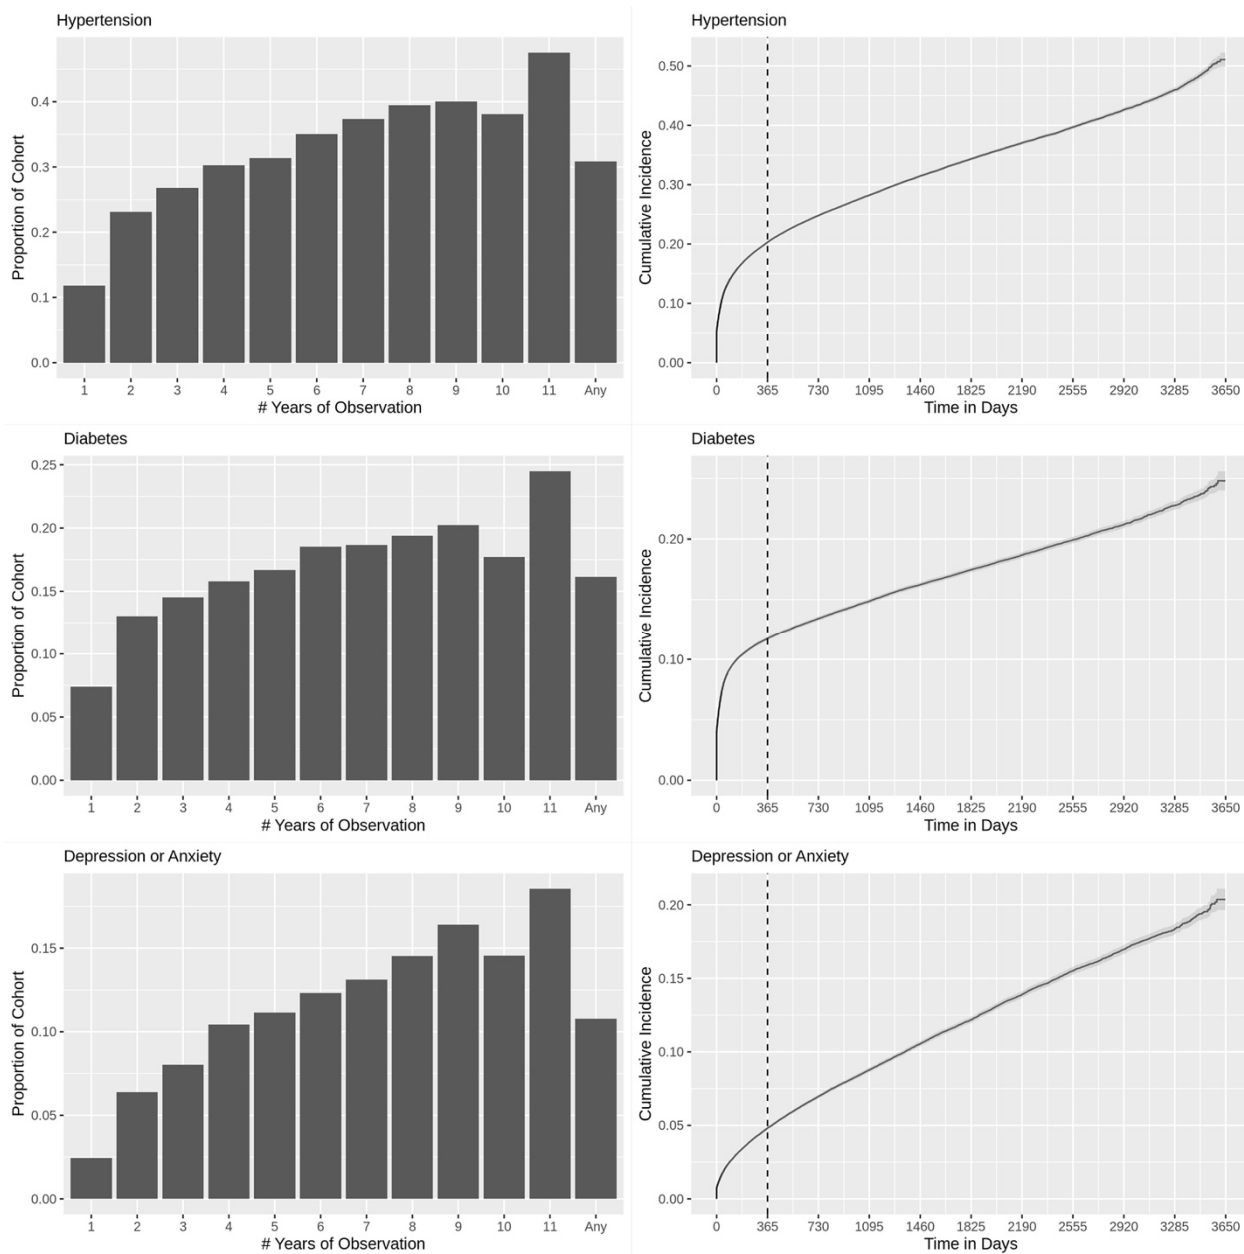

243  
 244 **Figure 1: Example observation-based period prevalence and cumulative incidence plots.**  
 245 Left column: Observation-based period prevalence. Right column: Cumulative incidence by days  
 246 of observation.  
 247

### 248 Condition co-occurrence patterns

249 Among the 103 172 (46.7%) clients with multimorbidity of at least three chronic conditions, there  
 250 are 25 162 unique combinations ranging in frequency from 1 (<0.1%) to 845 (0.4%) clients.

251 **Figure 2** presents the *Ising model* results. Pairwise associations between conditions on the log-  
 252 odds scale range from -0.82 (Osteoporosis—Obesity) to 2.93 (Kidney disease or failure—  
 253 Chronic urinary problem). There are 1 large, 5 medium, 40 small, and 207 very small  
 254 associations based on odds ratio magnitude. The five largest positive associations are 1) Kidney  
 255 Disease or Failure—Chronic Urinary Problem, 2) Smoking or Tobacco Use—Substance Use, 3)  
 256 Cardiovascular Disease—Heart Failure, 4) Hypertension—Hyperlipidemia, and 5)

257 Hypertension—Kidney Disease or Failure. In contrast, the top 5 co-occurring conditions based on  
 258 raw frequency are 1) Hyperlipidemia—Chronic Musculoskeletal, 2) Hypertension—Chronic  
 259 Musculoskeletal, 3) Hyperlipidemia—Hypertension, 4) Chronic Urinary Problem—Chronic  
 260 Musculoskeletal, 5) Asthma or COPD or Chronic Bronchitis—Chronic Musculoskeletal. These  
 261 directly correspond to the conditions with the highest marginal frequencies.  
 262

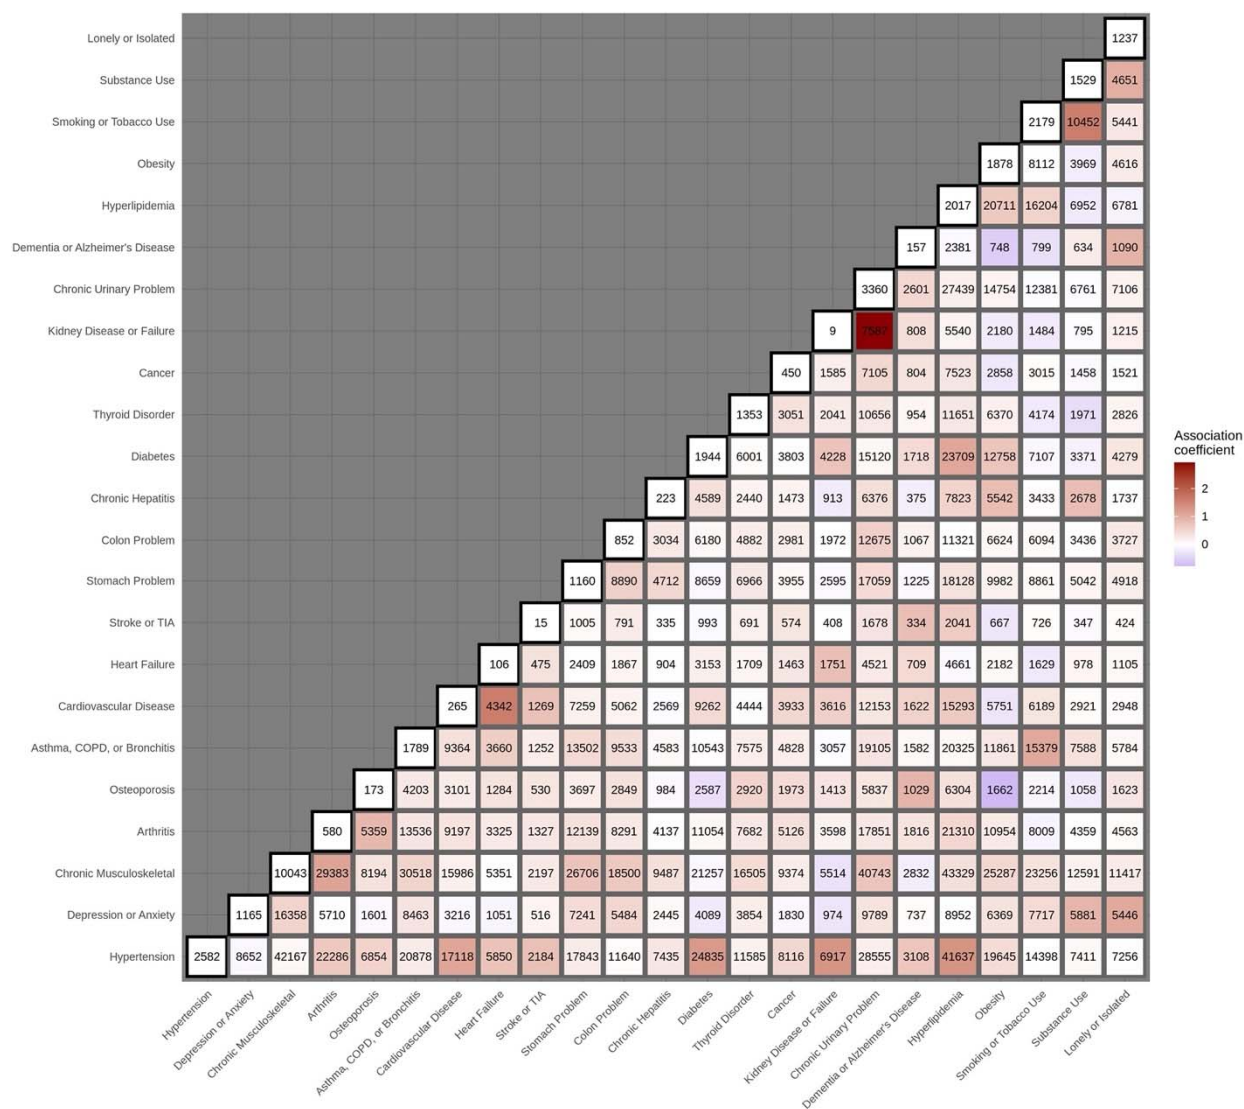

263  
 264 **Figure 2: Condition co-occurrence patterns.** Heatmap representing the results of the Ising  
 265 model. Shading is relative to the edge weights or strength of condition co-occurrence. The  
 266 numbers indicate raw counts in the data; diagonal counts represent clients who only have that  
 267 single condition. *Legend:* TIA = Transient Ischemic Attack; COPD = Chronic Obstructive  
 268 Pulmonary Disease.  
 269

## 270 **Health care use characteristics**

271 Table-based summaries of health care use characteristics are in Supplementary Appendix 3  
272 (Table S3). In general, UAR and multimorbidity strata had higher health care use while rural  
273 geography CHCs were closer to the overall population.

### 274 **Providers involved**

275 There are 19 394 unique combinations of the 68 distinct provider types seen across the 220 806  
276 (99.9%) clients with at least one provider type recorded. In terms of referrals, 102 088 (46.2%)  
277 clients had at least one internal and 143 922 (65.1%) had at least one external referral recorded.  
278 Note internal referrals may not capture “hallway referrals,” whereby a nearby provider provides a  
279 quick consult that is not formally recorded.

280  
281 **Figure 3** shows results of the *NMF analysis*, listing the highest-weighted provider types in each  
282 topic down to a weight of 3. For the *ever-seen* provider team analysis, physician and nursing  
283 provider types emerged most prominently overall. In general, as the number of topics increases,  
284 additional provider types emerge and then split apart to dominate separate topics. Exceptions are  
285 the high-weighted pairings of nurse and physician and of registered practical nurse and nurse  
286 practitioner. Overall, 18 of the 68 possible provider types emerge prominently in at least one  
287 topic; only one (respirologist) does not also appear in the amount-seen analysis.

288  
289 The *amount-seen* provider team analysis has greater weight distributions between provider types  
290 within topics. For example, the first of the three-topic analysis has an approximate 1:1:1:6 ratio  
291 of care provided by nurse practitioner:nurse:registered practical nurse:physician. In both versions,  
292 about half of clients have a non-zero weight for only one of the first two topics; in the amount-  
293 seen analysis more clients remain non-zero weight on only one topic as the number of topics  
294 increase, e.g. 16.6% versus 2.5% at five topics. In general, results suggests most clients receive  
295 the majority of care from physician, nurse practitioner, or nurse provider types, usually in  
296 combination with other provider types at a lower volume of care and with heterogeneous co-  
297 occurrence. An example of patterns that emerged for other provider types include differences in  
298 timing and weight of dietician/nutritionist and social worker providers between the two analyses.  
299 Interpreted alongside the most common provider and referrals types (Supplementary Appendix 3  
300 (Table S4)), findings suggest referrals to dietician/nutritionist are more common than to social  
301 worker, but frequent or longer-term care is more commonly provided by social workers.

302  
303

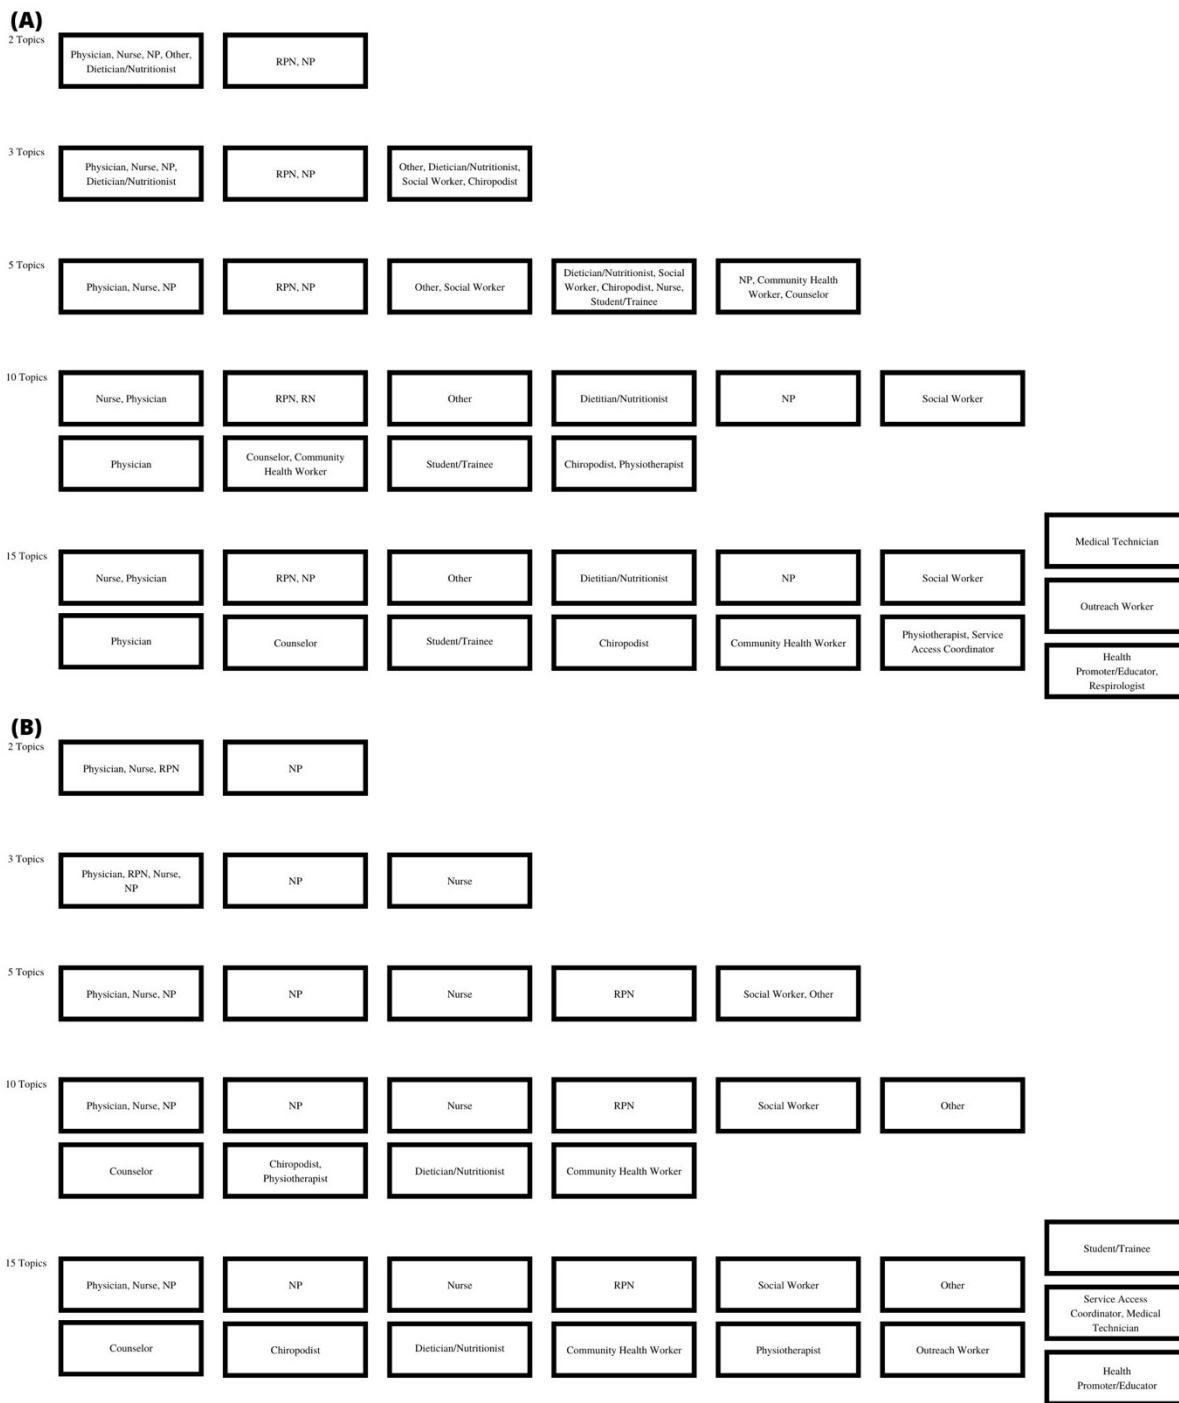

304

305  
306  
307  
308  
309  
310  
311  
312  
313

**Figure 3: Common care provider teams.** Boxes represent the topics resulting from the non-negative matrix factorization analysis for A) Ever-seen provider team analysis. B) Relative amount seen provider team analysis. Provider types are listed in order starting with the highest weighted provider; for any given topic, provider types with a weight less than three are not show. Legend: NP = Nurse Practitioner, RPN = Registered Practical Nurse.



314 **Care access patterns**

315 *Complexity of care* from a CHC-perspective is primarily low with 80.4% of client-visits  
316 associated with a single-issue and under 1.0% having over five issues addressed (higher  
317 intensity); however, from a client-perspective, 24 204 (11.0%) experience at least one visit with  
318 over five issues while 38 533 (17.4%) experience a maximum of one issue per visit across their  
319 care history. The mean *care access frequency* is 6 days per year (standard deviation=7.4). While  
320 29 191 (13.2%) clients experience at least one year with over 25 days, 7455 (3.4%) average over  
321 25 days per year across their entire care history. There are 8700 (3.94%) clients with at least one  
322 frequent care period (year with over 25 days care accessed) and complex care episode (visit with  
323 over 5 issues addressed).

324  
325 For the *time series clustering* analyses, the short-term cohort includes 37 920 clients and 93 625  
326 client-years of observation; the long-term cohort includes 42 855 clients and 387 035 client-years  
327 of observation. The silhouette score was always highest for two clusters (Supplementary  
328 Appendix 3 (Table S5)). Visual inspection of plots (**Figure 4**) shows high variability within and  
329 between clients.  
330

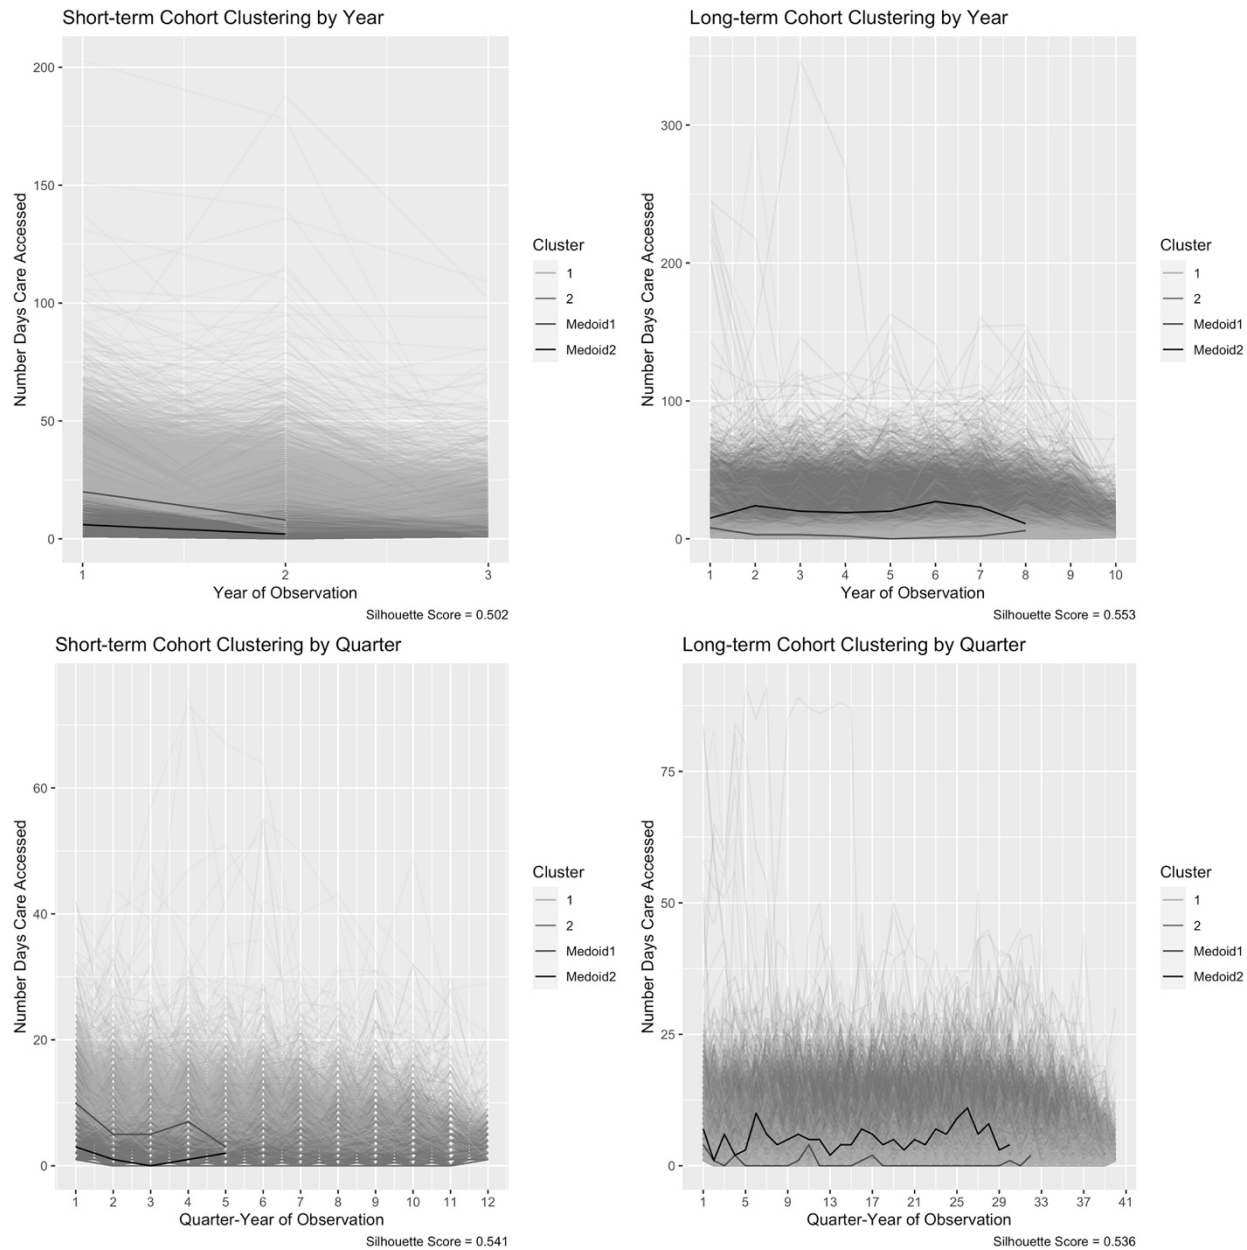

331  
332 **Figure 4: Care frequency clusters.** Results from the four time series clustering analyses for  
333 each cohort and data-representation combination. Medoids are shown with raw time series data,  
334 separated by cluster number, for the number of clusters that resulted in the highest silhouette  
335 score (SS).  
336

## 337 Discussion

338 We used statistical and artificial intelligence techniques to summarize sociodemographic,  
339 clinical, and health care use characteristics captured in the EHRs of ongoing PC clients served by  
340 the Alliance. Substantive findings can motivate new topics for future LHS initiatives, or help to  
341 refine existing ideas and selection of performance measures for long-term evaluation of  
342 implemented interventions. Methods-related findings may inform the approaches used in these  
343 endeavours. While our discussion focuses on LHS initiatives, as with any epidemiological study,

344 substantive results may be immediately useful to the population of interest, e.g., to inform clinic-  
345 level case management and onboarding of new clients.

346

## 347 **Sociodemographic characteristics**

348 The CHC EHRs contain rich sociodemographic information, both the presence and absence of  
349 which is informative. Social determinants of health were more prevalent in UAR CHC and  
350 multimorbidity strata, and there appears to be evidence for the healthy immigrant effect [37].  
351 Completeness rates vary by characteristic and may be due to client, provider, or CHC level  
352 decisions. For example, of the 72 059 (32.60%) clients asked about gender only 1001 (1.39%)  
353 preferred to not answer. In contrast, more clients, 171 266 (77.48%), were asked about household  
354 income but there was a higher tendency to not answer, 27 621 (16.13%). These findings align  
355 with a framework to assess selection bias in EHR data that suggests multiple mechanisms are  
356 usually responsible for missingness so the focus should be on “what data are observed [instead of  
357 missing] and why?”[38] While provider-level decisions may be due to inferring certain  
358 characteristics or prioritizing information needed for them to direct care, completeness rates are  
359 important for decision support tool performance, which can improve with social determinants of  
360 health information [39, 40].

361

362 When assessing data quality and completeness, which is emphasized by machine learning for  
363 EHR guidelines [2, 4, 19, 41, 42], the implications of pursuing LHS initiatives at different levels  
364 should also be considered. For example, a subset of CHCs capture self-reported measures of  
365 health, which are valuable research outcomes [43]. While these measures are not suitable for  
366 population level analyses, they should be considered for initiatives specific to the collecting  
367 CHCs.

368

## 369 **Clinical characteristics**

### 370 **Prevalence and incidence**

371 In operationalizing morbidity measures, the denominator must be defined with the intended end-  
372 goal in mind. The *eleven-year period prevalence* estimates relate to a CHC-based perspective and  
373 are useful for long-term system-level planning, while the *observation-based period prevalence*  
374 estimates are more aligned with a client-based perspective and absolute measure of risk. Another  
375 consideration is that just as ICD-10 or ENCODE-FM codes do not guarantee true condition  
376 presence, the absence of care does not verify absence of conditions [44]. For example, clients  
377 may not seek PC when they are healthy, hospitalized, or experiencing barriers to care.

378

379 The *cumulative incidence* plots demonstrate that “risk” of condition codes is highest in the first  
380 year of observation. Clinically this makes sense, as new clients may have a build-up of unmet  
381 care needs. Nonetheless, there are important takeaways for LHS initiatives that require cohort  
382 construction. For example, predictive models developed for decision support need to account for  
383 the almost qualitative change in risk related to being a new client. Although this care pattern is  
384 somewhat unique to PC settings, methods developed for related problems may be useful. For  
385 example, accounting for variable lengths of stay in intensive care unit EHRs [45], or handling  
386 cold-starts and sparse data for recommender systems [46].

387

### 388 **Condition co-occurrence patterns**

389 There is a high prevalence of multimorbidity, but with so many different multimorbidity  
390 “compositions” it is hard to see how to make use of the category of multimorbidity. The *Ising*  
391 *model* demonstrates how to go beyond frequency-based comparisons and identify relationships  
392 between conditions irrespective of others, but again, this presents as a long tail problem, with  
393 very few combinations that are very prominent. PC decision support tools will face the challenge  
394 of making recommendations on many different and possibly co-occurring conditions. The  
395 majority of existing decision support tools and clinical guidelines focus on a single condition at a  
396 time; new techniques for providing evidence-based guidelines or recommendations for these vast  
397 numbers of combinations are needed [47–50].

398

## 399 **Health care use characteristics**

### 400 **Providers involved**

401 While care for ongoing PC clients is typically led by physicians or nurse practitioners, CHCs  
402 include many provider types and LHS initiatives may choose to focus on particular provider  
403 type(s). The *NMF analyses* more easily identify reliable patterns of commonly seen provider  
404 types and teams than manually sifting through extensive count-based tables. Another use for  
405 NMF is dimensionality reduction or data pre-processing, whereby data are summarized to reduce  
406 the number of variables that need to be included in an analysis [33]. For example, NMF-derived  
407 topics could be used as inputs to a predictive model instead of separate variables to represent  
408 each provider type or specific, manually selected combinations.

409

### 410 **Care access patterns**

411 *Complexity of care* from a CHC system-level perspective is primarily low intensity (few  
412 problems addressed per visit). The subset of clients who experience higher care complexity do  
413 not tend to also have high frequency of care. Sporadic visit patterns may be due to unstable living  
414 arrangements or demanding life responsibilities; when there is uncertainty about when a client  
415 will return, providers may pack together multiple types of care. The marginal distribution of *care*  
416 *frequency* is right-skewed without a distinct break; most clients experience lower care frequency,  
417 but higher frequencies are also observed. In contrast to expectations, we did not identify  
418 consistent, distinct client groupings through the time-series clustering, e.g., to indicate a  
419 subpopulation of “frequent visitors.” This may be due to restrictions in the types of similarity that  
420 dynamic time warping captures. Future analyses could try a different similarity metric or  
421 including covariates to account for baseline variability.

422

### 423 **Strengths and Limitations**

424 Strengths include the deep interdisciplinary approach used to assess complex, longitudinal EHR  
425 data. We used chronic condition definitions recommended for PC research;[26–28] although the  
426 algorithms have not been validated for CHCs specifically. Our broad cohort definition supports a  
427 high-level overview of the population, but may not be appropriate for specific research questions.

428

### 429 **Conclusions**

430 This study demonstrates the use of simple statistics and artificial intelligence techniques, applied  
431 with an epidemiological lens, to describe EHR data from a budding LHS. Substantive findings

432 lay a foundation for future Alliance initiatives and may be informative for other organizations  
433 serving complex PC populations.

434  
435 Key suggestions for future LHS initiatives include the need to carefully deliberate the level of  
436 analysis, or who a given initiative should be targeted at (e.g., population or specific CHCs, one or  
437 many clinical presentations, all or subset of providers), and the associated implications for how  
438 clients will be represented in the data. Representation will depend on analytical-, system-,  
439 provider-, and client-level factors. Decision support initiatives need to consider heterogeneity in  
440 conditions and care access patterns, including non-uniform risk of condition indications across  
441 observation history.

442

## 443 **Acknowledgements**

444 This work was supported by the Canadian Institutes of Health Research Canadian Graduate  
445 Scholarship-Doctoral to JKK with supervisor DJL.

446

## 447 **Statement on conflicts of interest**

448 None declared.

449

## 450 **Ethics statement**

451 This study was approved by Western University Review Ethics Board project ID 111353.

452

## 453 **Supplementary appendices**

454 *Appendix 1* includes extended results presented through figures.

455 *Appendix 2* includes the RECORD reporting guideline checklist.

456 *Appendix 3* includes extended results presented through tables and technical details.

457

## 458 **References**

459 [1] Friedman CP, Allee NJ, Delaney BC, et al. The science of Learning Health Systems:  
460 Foundations for a new journal. *Learn Health Syst* 2017; 1: e10020. Doi: 10.1002/lrh2.10020

461 [2] Foley T, Horwitz L, Zahran R. *Realising the potential of learning health systems*.  
462 Newcastle University: The Learning Healthcare Project. [https://learninghealthcareproject.org/wp-](https://learninghealthcareproject.org/wp-content/uploads/2021/05/LHS2021report.pdf)  
463 [content/uploads/2021/05/LHS2021report.pdf](https://learninghealthcareproject.org/wp-content/uploads/2021/05/LHS2021report.pdf)

464 [3] Delaney BC, Peterson KA, Speedie S, et al. Envisioning a Learning Health Care System:  
465 The Electronic Primary Care Research Network, a case study. *Ann Fam Med* 2012; 10: 54–59.  
466 Doi: 10.1370/afm.1313

467 [4] Lindsell CJ, Gatto CL, Dear ML, et al. Learning From What We Do, and Doing What We  
468 Learn: A Learning Health Care System in Action. *Academic Medicine* 2021; 96: 1291–1299.  
469 Doi: 10.1097/ACM.0000000000004021

470 [5] Nash DM, Bhimani Z, Rayner J, et al. Learning health systems in primary care: A  
471 systematic scoping review. *BMC Fam Pract* 2021; 22: 126. Doi: 10.1186/s12875-021-01483-z

472 [6] Robinson JM, Trochim WMK. An examination of community members', researchers'  
473 and health professionals' perceptions of barriers to minority participation in medical research: An



- 474 application of concept mapping. *Ethn & Health* 2007; 12: 521–539. Doi:  
475 10.1080/13557850701616987
- 476 [7] George S, Duran N, Norris K. A systematic review of barriers and facilitators to minority  
477 research participation among African Americans, Latinos, Asian Americans, and Pacific  
478 Islanders. *Am J Public Health* 2014; 104: e16–e31. Doi: 10.2105/AJPH.2013.301706
- 479 [8] Odierna DH, Schmidt LA. The effects of failing to include hard-to-reach respondents in  
480 longitudinal surveys. *Am J Public Health* 2009; 99: 1515–1521. Doi:  
481 10.2105/AJPH.2007.111138
- 482 [9] Bonevski B, Randell M, Paul C, et al. Reaching the hard-to-reach: A systematic review of  
483 strategies for improving health and medical research with socially disadvantaged groups. *BMC*  
484 *Med Res Methodol* 2014; 14: 42. Doi: 10.1186/1471-2288-14-42
- 485 [10] Starfield B. *Primary care. Balancing health needs, services, and technology*. New York,  
486 NY: Oxford University Press, Inc., 1998.
- 487 [11] CIHR. *CIHR Primary Healthcare Summit 2010 Final Report Summary*. Toronto, Ontario:  
488 Canadian Institutes of Health Research, 2010.
- 489 [12] Glazier RH, Zagorski B, Rayner J. *Comparison of primary care models in Ontario by*  
490 *demographics, case mix and emergency department use, 2008/09 to 2009/10*. {ICES}  
491 {Investigative} {Report}, Toronto, Ont.: Institute for Clinical Evaluative Sciences,  
492 <https://www.deslibris.ca/ID/232144> (2012, accessed 6 May 2020).
- 493 [13] Booth RG, Richard L, Li L, et al. Characteristics of health care related to mental health  
494 and substance use disorders among Community Health Centre clients in Ontario: A population-  
495 based cohort study. *cmajo* 2020; 8: E391–E399. Doi: 10.9778/cmajo.20190089
- 496 [14] Albrecht D. Community health centres in Canada. *Leadersh Health Serv* 1998; 11: 5–10.  
497 Doi: 10.1108/13660759810202596
- 498 [15] Alliance for Healthier Communities. Moving Forward as a Learning Health System.  
499 *Alliance for Healthier Communities*, [https://myemail.constantcontact.com/EPIC-News--Issue-](https://myemail.constantcontact.com/EPIC-News--Issue-1.html?soid=1108953382524&aid=uzy8bphr91U)  
500 [1.html?soid=1108953382524&aid=uzy8bphr91U](https://myemail.constantcontact.com/EPIC-News--Issue-1.html?soid=1108953382524&aid=uzy8bphr91U) (2020, accessed 23 November 2020).
- 501 [16] Alliance for Healthier Communities. *Towards a Learning Health System: Better Care*  
502 *Tomorrow When We Learn from Today*. Alliance for Healthier Communities.  
503 [https://www.allianceon.org/sites/default/files/documents/Learning%20Health%20System%20rep-](https://www.allianceon.org/sites/default/files/documents/Learning%20Health%20System%20report%202020-10-20%20-%20FINAL_JR.pdf)  
504 [ort%202020-10-20%20-%20FINAL\\_JR.pdf](https://www.allianceon.org/sites/default/files/documents/Learning%20Health%20System%20report%202020-10-20%20-%20FINAL_JR.pdf)
- 505 [17] Cameron D, Jones IG. John Snow, the Broad Street Pump and Modern Epidemiology. *Int*  
506 *J Epidemiol* 1983; 12: 393–396. Doi: 10.1093/ije/12.4.393
- 507 [18] Thuraisingam S, Chondros P, Dowsey MM, et al. Assessing the suitability of general  
508 practice electronic health records for clinical prediction model development: A data quality  
509 assessment. *BMC Medl Inform Decis Mak* 2021; 21: 297. Doi: 10.1186/s12911-021-01669-6
- 510 [19] Verma AA, Murray J, Greiner R, et al. Implementing machine learning in medicine.  
511 *CMAJ* 2021; 193: E1351–E1357. Doi: 10.1503/cmaj.202434
- 512 [20] Lee S, Xu Y, D’Souza AG, et al. Unlocking the Potential of Electronic Health Records  
513 for Health Research. *Int J Popul Data Sci* 2020; 5: 02. Doi: 10.23889/ijpds.v5i1.1123
- 514 [21] Westfall JM, Wittenberg HR, Liaw W. Time to invest in primary care research—  
515 commentary on findings from an independent congressionally mandated study. *J Gen Intern Med*  
516 2021; 36: 2117–2120. Doi: 10.1007/s11606-020-06560-0
- 517 [22] ENCODE-FM. Electronic Nomenclature and Classification Of Disorders and Encounters  
518 for Family Medicine. *ENCODE-FM*, <http://aix1.uottawa.ca/~fammed/fmcencod.htm> (2020,  
519 accessed 6 April 2020).



- 520 [23] Organization WH. ICD-10 Version:2019. *World Health Organization*,  
521 <https://icd.who.int/browse10/2019/en> (2020, accessed 6 April 2020).
- 522 [24] Benchimol EI, Smeeth L, Guttmann A, et al. The REporting of studies Conducted using  
523 Observational Routinely-collected health Data (RECORD) Statement. *PLoS Med* 2015; 12:  
524 e1001885. Doi: 10.1371/journal.pmed.1001885
- 525 [25] Glazier RH, Rayner J, Kopp A. *Examining community health centres according to*  
526 *geography and priority populations served, 2011/12 to 2012/13: An ICES chartbook*. Toronto,  
527 Ontario: Institute for Clinical Evaluative Sciences in Ontario, <http://www.deslibris.ca/ID/248807>  
528 (2015, accessed 20 January 2020).
- 529 [26] Fortin M, Almirall J, Nicholson K. Development of a research tool to document self-  
530 reported chronic conditions in primary care. *J Comorb* 2017; 7: 117–123. Doi:  
531 10.15256/joc.2017.7.122
- 532 [27] Lee ES, Lee PSS, Xie Y, et al. The prevalence of multimorbidity in primary care: A  
533 comparison of two definitions of multimorbidity with two different lists of chronic conditions in  
534 Singapore. *BMC Public Health* 2021; 21: 1409. Doi: 10.1186/s12889-021-11464-7
- 535 [28] Lee YAJ, Xie Y, Lee PSS, et al. Comparing the prevalence of multimorbidity using  
536 different operational definitions in primary care in Singapore based on a cross-sectional study  
537 using retrospective, large administrative data. *BMJ Open* 2020; 10: e039440. Doi:  
538 10.1136/bmjopen-2020-039440
- 539 [29] Therneau T. A Package for Survival Analysis in R, [https://CRAN.R-](https://CRAN.R-project.org/package=survival)  
540 [project.org/package=survival](https://CRAN.R-project.org/package=survival) (2021).
- 541 [30] van Borkulo CD, Borsboom D, Epskamp S, et al. A new method for constructing  
542 networks from binary data. *Sci Rep* 2014; 4: 5918. Doi: 10.1038/srep05918
- 543 [31] Clark NJ, Wells K, Lindberg O. Unravelling changing interspecific interactions across  
544 environmental gradients using Markov random fields. *Ecology* 2018; 99: 1277–1283. Doi:  
545 10.1002/ecy.2221
- 546 [32] Chen H, Cohen P, Chen S. How big is a big odds ratio? Interpreting the magnitudes of  
547 odds ratios in epidemiological studies. *Commun Stat Simul Comput* 2010; 39: 860–864.
- 548 [33] Wang Y-X, Zhang Y-J. Nonnegative Matrix Factorization: A Comprehensive Review.  
549 *IEEE Trans Knowl Data Eng* 2013; 25: 1336–1353. Doi: 10.1080/03610911003650383
- 550 [34] Pedregosa F, Varoquaux G, Gramfort A, et al. Scikit-learn: Machine learning in Python. *J*  
551 *Mach Learn Res* 2011; 12: 2825–2830. <http://jmlr.org/papers/v12/pedregosa11a.html>
- 552 [35] Aghabozorgi S, Seyed Shirkhorshidi A, Ying Wah T. Time-series clustering – A decade  
553 review. *Information Systems* 2015; 53: 16–38. Doi: 10.1016/j.is.2015.04.007
- 554 [36] Montero P, Vilar JA. TSclust: An R Package for Time Series Clustering. *J Stat Softw*  
555 2015; 62: 1–43. Doi: 10.18637/jss.v062.i01
- 556 [37] McDonald JT, Kennedy S. Insights into the “healthy immigrant effect”: Health status and  
557 health service use of immigrants to Canada. *Soc Sci Med* 2004; 59: 1613–1627. Doi:  
558 10.1016/j.socscimed.2004.02.004
- 559 [38] Haneuse S, Daniels M. A general framework for considering selection bias in EHR-based  
560 studies: What data are observed and why? *eGEMs*; 4. Epub ahead of print August 2016. DOI:  
561 10.13063/2327-9214.1203. Doi: 10.13063/2327-9214.1203
- 562 [39] Chen M, Tan X, Padman R. Social determinants of health in electronic health records and  
563 their impact on analysis and risk prediction: A systematic review. *J Am Med Inform Assoc* 2020;  
564 27: 1764–1773. Doi: 10.1093/jamia/ocaa143

- 565 [40] Zhao Y, Wood EP, Mirin N, et al. Social determinants in machine learning cardiovascular  
566 disease prediction models: A systematic review. *Am J Prev Med*; 0. Epub ahead of print July  
567 2021. DOI: 10.1016/j.amepre.2021.04.016. Doi: 10.1016/j.amepre.2021.04.016
- 568 [41] Wiens J, Saria S, Sendak M, et al. Do no harm: A roadmap for responsible machine  
569 learning for health care. *Nat Med* 2019; 25: 1337–1340. Doi: 10.1038/s41591-019-0548-6
- 570 [42] Arbet J, Brokamp C, Meinzen-Derr J, et al. Lessons and tips for designing a machine  
571 learning study using EHR data. *J Clin Transl Sci* 2020; 5: 1–10. Doi: 10.1017/cts.2020.513
- 572 [43] CIHI. Patient-reported outcome measures (PROMs). *Canadian Institute for Health*  
573 *Information*, <https://www.cihi.ca/en/patient-reported-outcome-measures-proms> (2022, accessed 7  
574 February 2022).
- 575 [44] Bagley SC, Altman RB. Computing disease incidence, prevalence and comorbidity from  
576 electronic medical records. *J Biomed Inform* 2016; 63: 108–111. Doi: 10.1016/j.jbi.2016.08.005
- 577 [45] Zhang L, Chen X, Chen T, et al. DynEHR: Dynamic adaptation of models with data  
578 heterogeneity in electronic health records. In: *2021 IEEE EMBS International Conference on*  
579 *Biomedical and Health Informatics (BHI)*. 2021, pp. 1–4. Doi: 10.1109/BHI50953.2021.9508558
- 580 [46] Alyari F, Jafari Navimipour N. Recommender systems: A systematic review of the state  
581 of the art literature and suggestions for future research. *Kybernetes* 2018; 47: 985–1017. Doi:  
582 10.1108/K-06-2017-0196
- 583 [47] Moons KGM, Altman DG, Vergouwe Y, et al. Prognosis and prognostic research:  
584 Application and impact of prognostic models in clinical practice. *BMJ* 2009; 338: b606. Doi:  
585 10.1136/bmj.b606
- 586 [48] O’Caoimh R, Cornally N, Weathers E, et al. Risk prediction in the community: A  
587 systematic review of case-finding instruments that predict adverse healthcare outcomes in  
588 community-dwelling older adults. *Maturitas* 2015; 82: 3–21. Doi:  
589 10.1016/j.maturitas.2015.03.009
- 590 [49] Goldstein BA, Navar AM, Pencina MJ, et al. Opportunities and challenges in developing  
591 risk prediction models with electronic health records data: A systematic review. *J Am Med Inform*  
592 *Assoc* 2017; 24: 198–208. Doi: 10.1093/jamia/ocw042
- 593 [50] Guthrie B, Boyd CM. Clinical guidelines in the context of aging and multimorbidity.  
594 *Public Policy Aging Rep* 2018; 28: 143–149. Doi: 10.1093/ppar/pry038

595  
596

## 597 **Abbreviations**

- 598 CHC: Community Health Centre  
599 EHR: Electronic Health Record  
600 ENCODE-FM: Electronic Nomenclature and Classification Of Disorders and Encounters for  
601 Family Medicine  
602 ICD-10: International Classification of Disease - Version 10  
603 LHS: Learning Health System  
604 NMF: non-negative matrix factorization  
605 PC: Primary Care  
606 UAR: Urban At-Risk  
607  
608

609

## Supplementary Material

### 610 Appendix 1

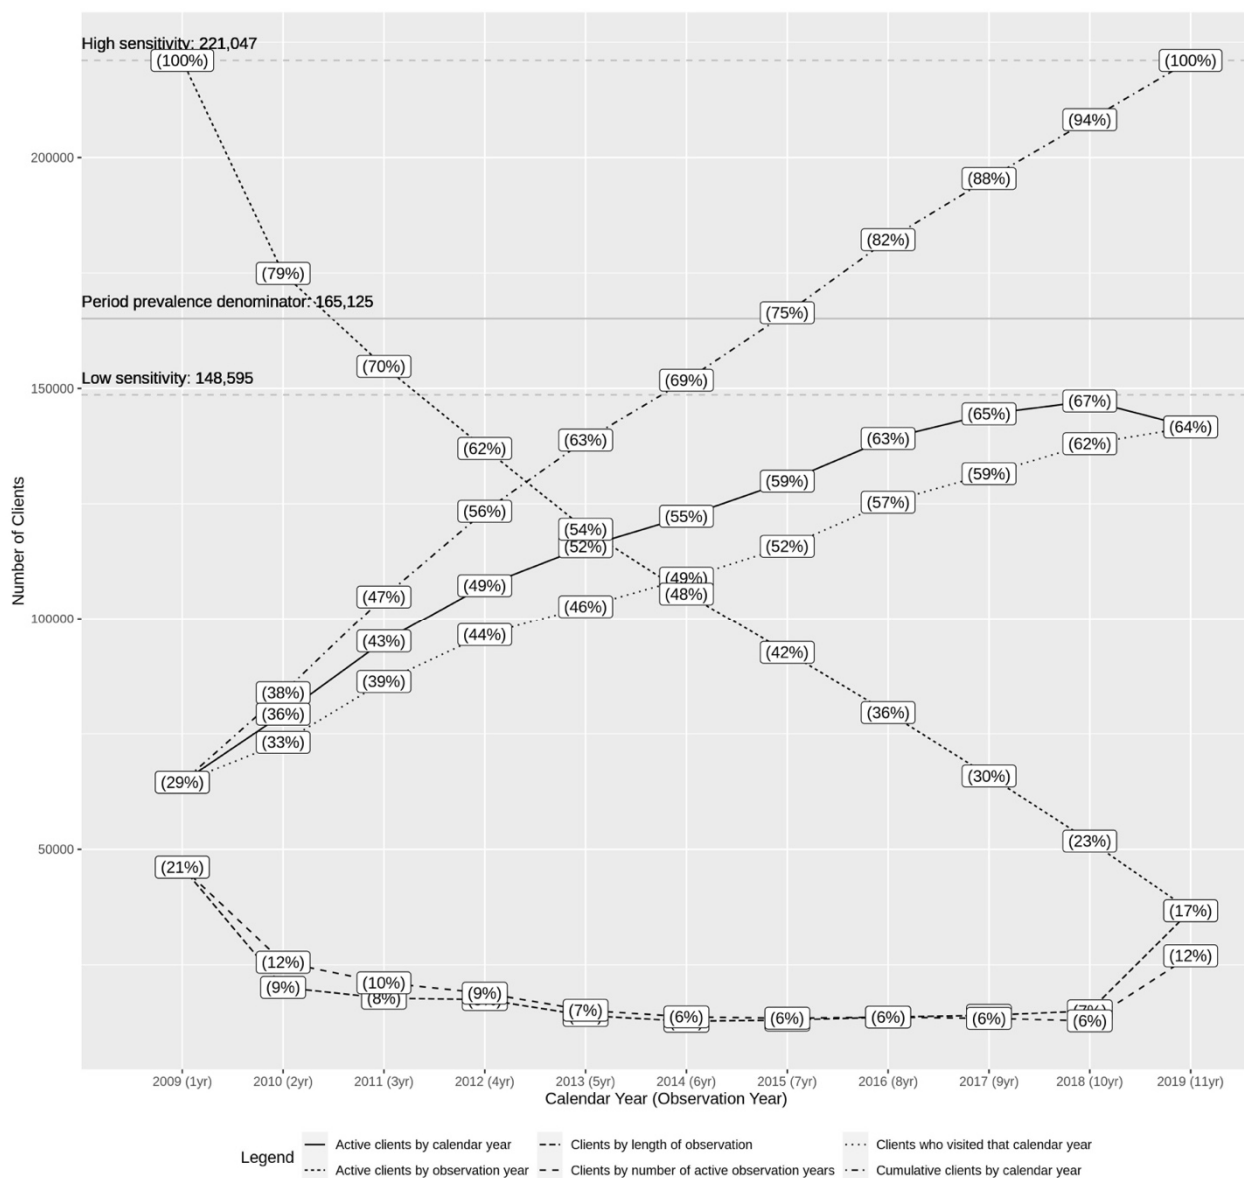

611

612

613

614

615

616

617

618

619

620

**Figure S1: Cohort size by calendar- and observation-based time.** Active clients have at least one event during or after the year (calendar- or observation-based) of interest (gap years counted). The number of active observation years refers to the number of 365.25 day periods, counted from the first calendar date that an event was recorded for that client, that clients have at least one event recorded (gap years not counted). Length of observation refers to the number of years from the first to the last year that at least one event is recorded during (gap years counted). Cumulative clients refers to the number of clients who have had at least one event during or before the year of interest. *Legend:* COPD = Chronic Obstructive Pulmonary Disease; TIA = Transient Ischemic Attack; AD = Alzheimer’s Disease.

621

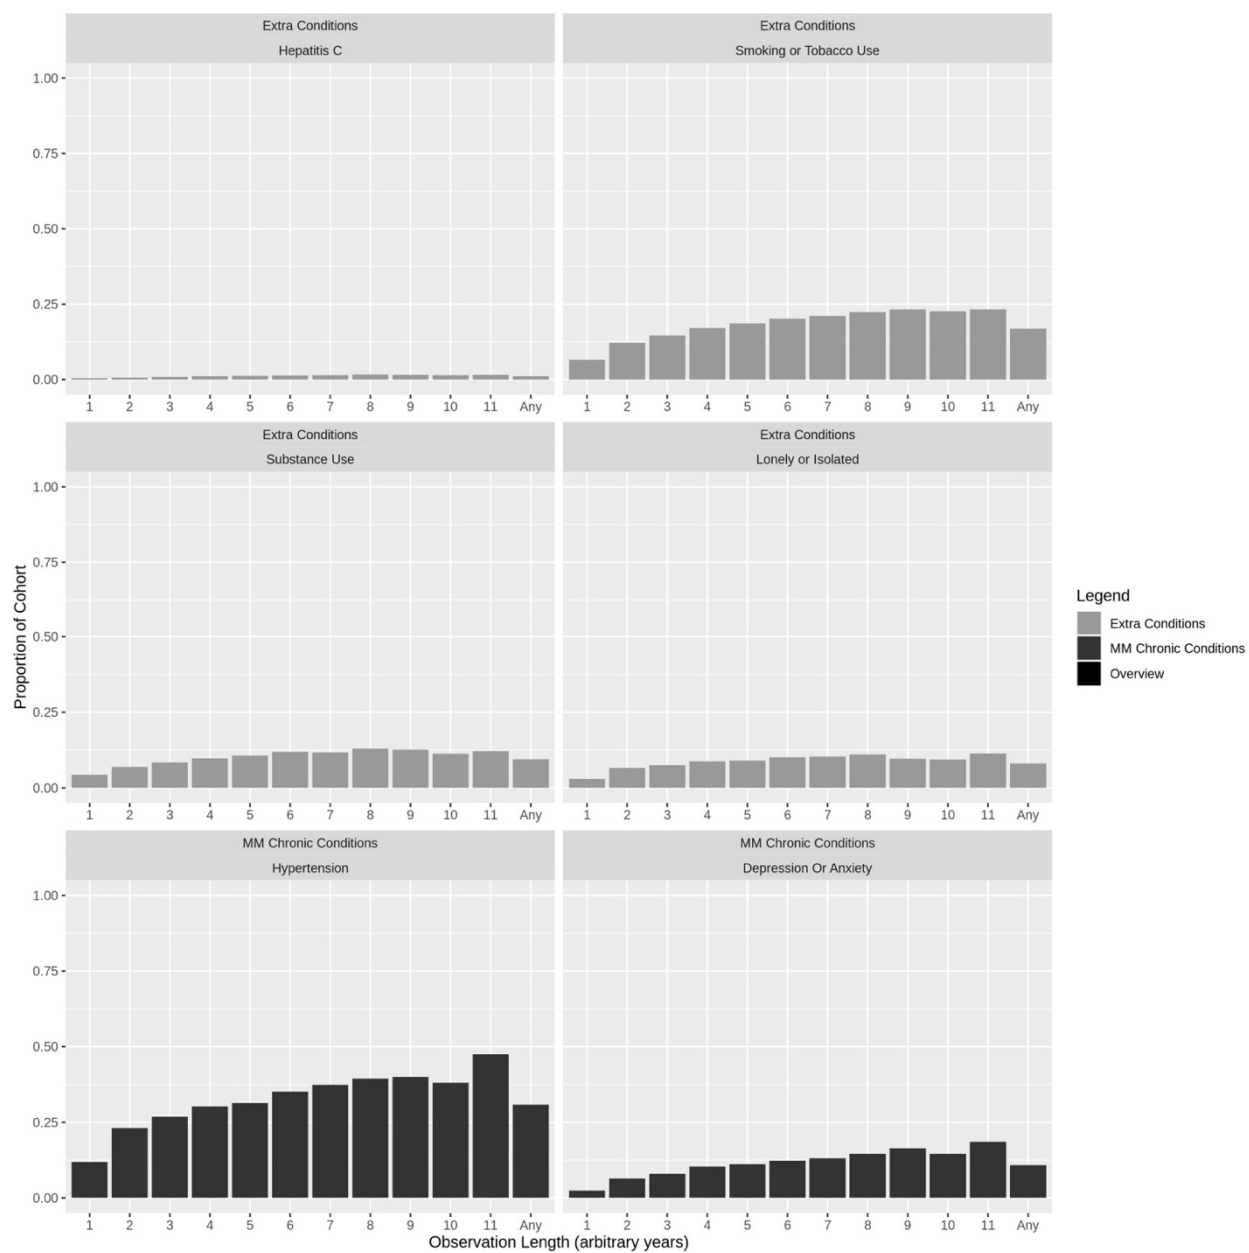

622

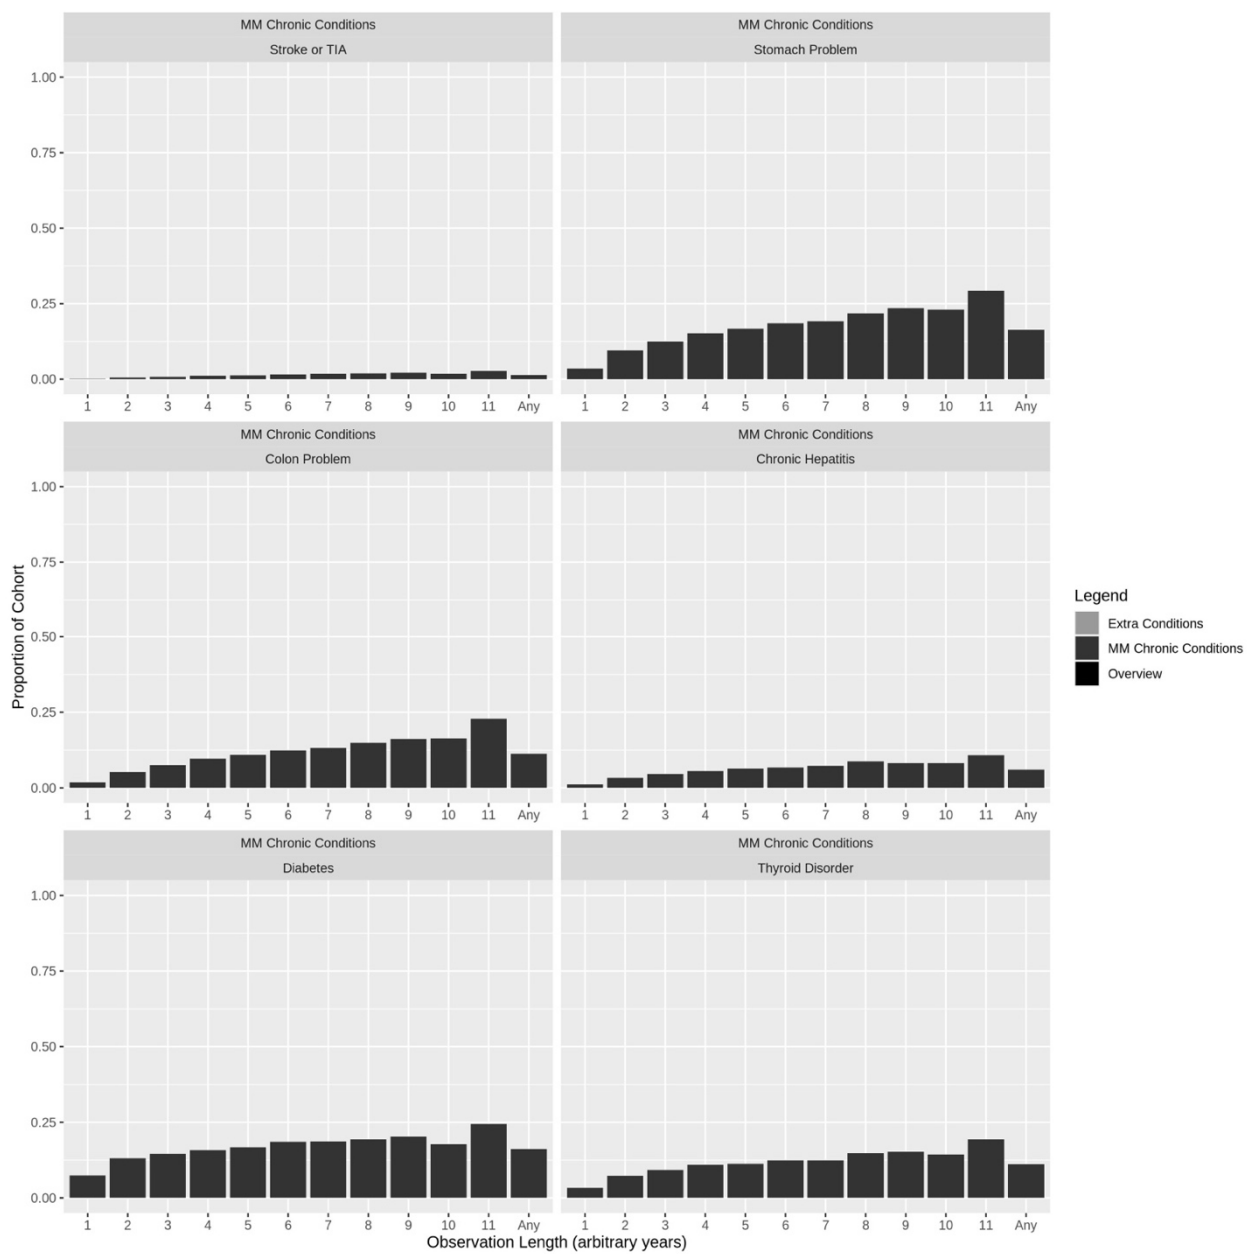

623  
624

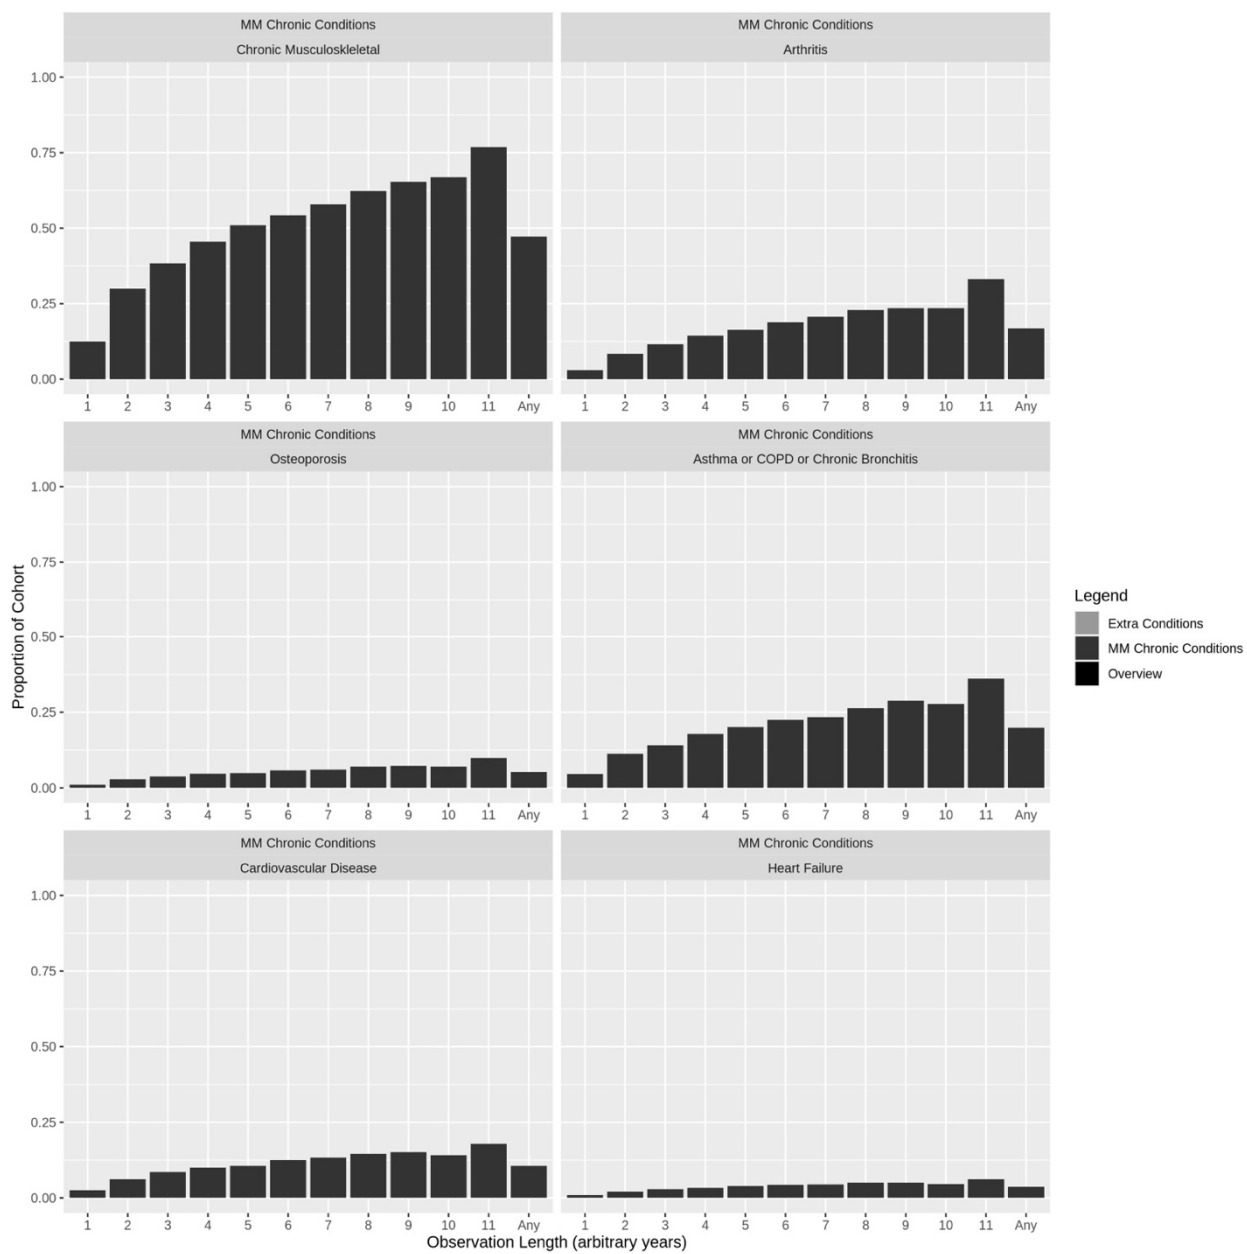

625  
626



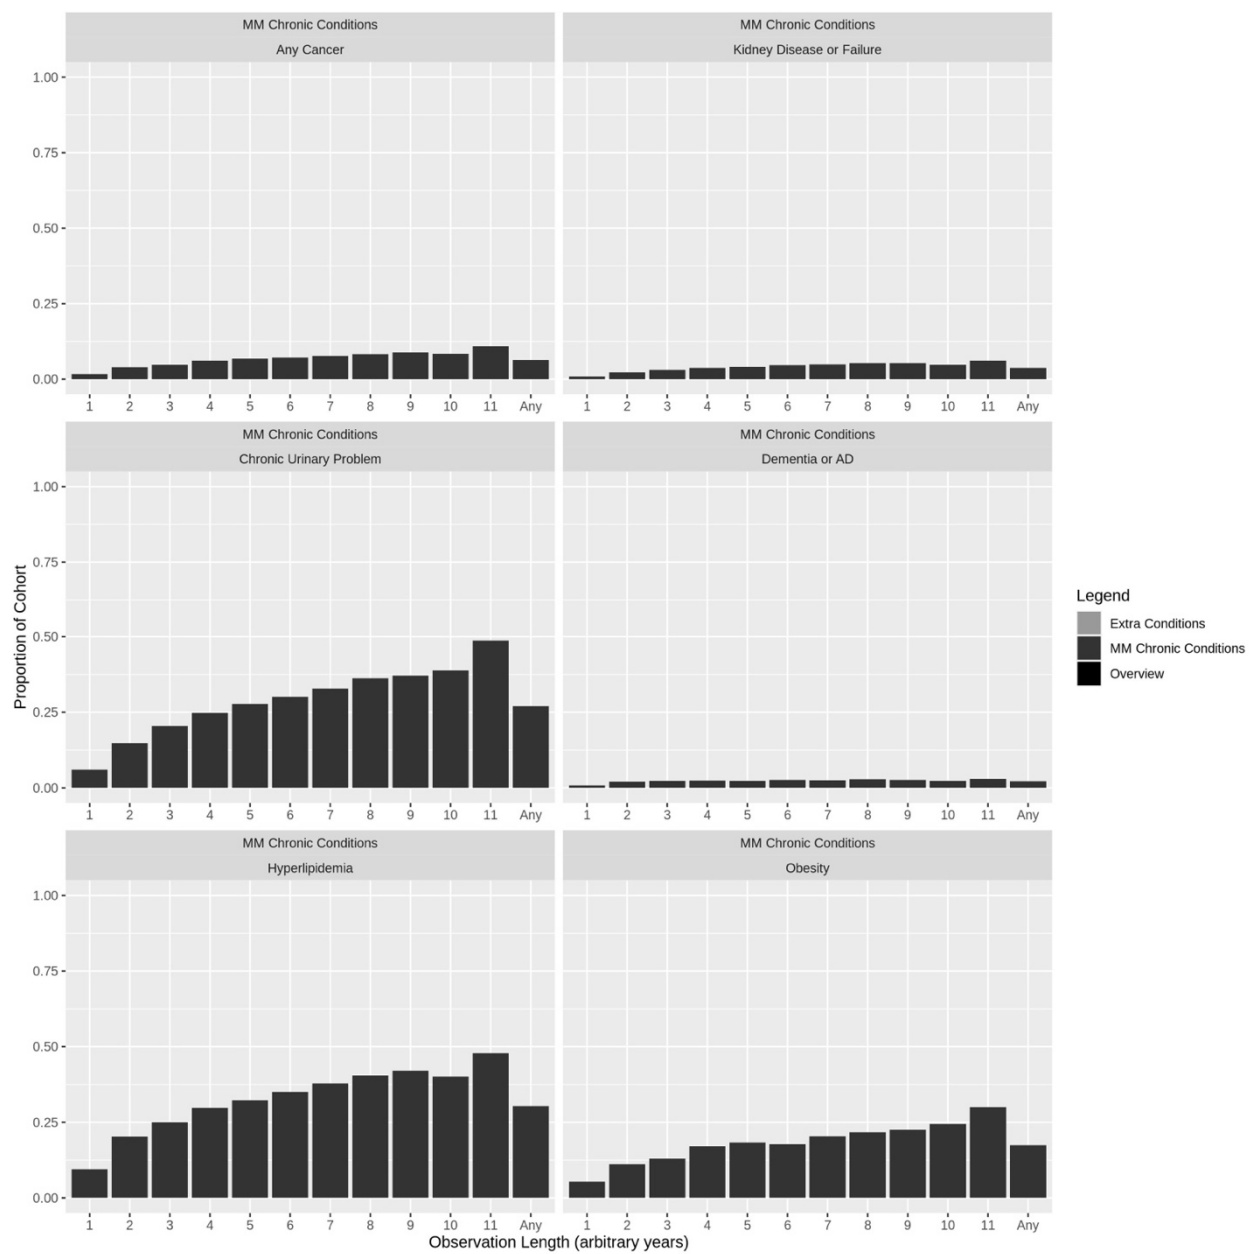

627

628

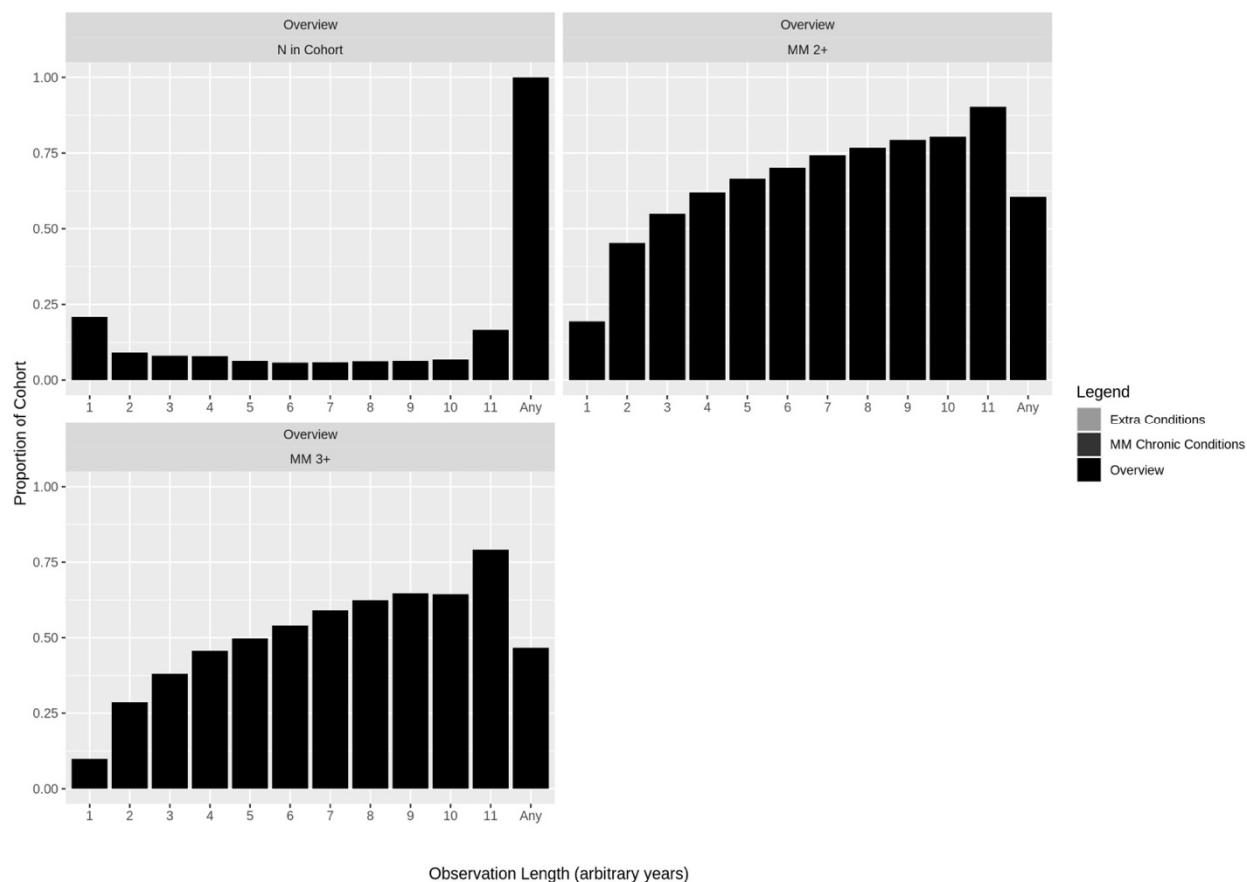

629

630

631

632

633

634

635

636

637

638

639

**Figure S2: Observation-based period prevalence.** Each bar represents the proportion of clients within that observation-based cohort (years are arbitrary 365.25 day consecutive periods between the first and last recorded events) that have at least one indication of the condition of interest across their entire observation history. Conditions are grouped to represent 1) Extra conditions of interest to Alliance stakeholders, 2) 20 chronic conditions, which make up multimorbidity (MM) status, and 3) Overview indicators for the cohorts. *Legend:* COPD = Chronic Obstructive Pulmonary Disease; TIA = Transient Ischemic Attack; AD = Alzheimer’s Disease.

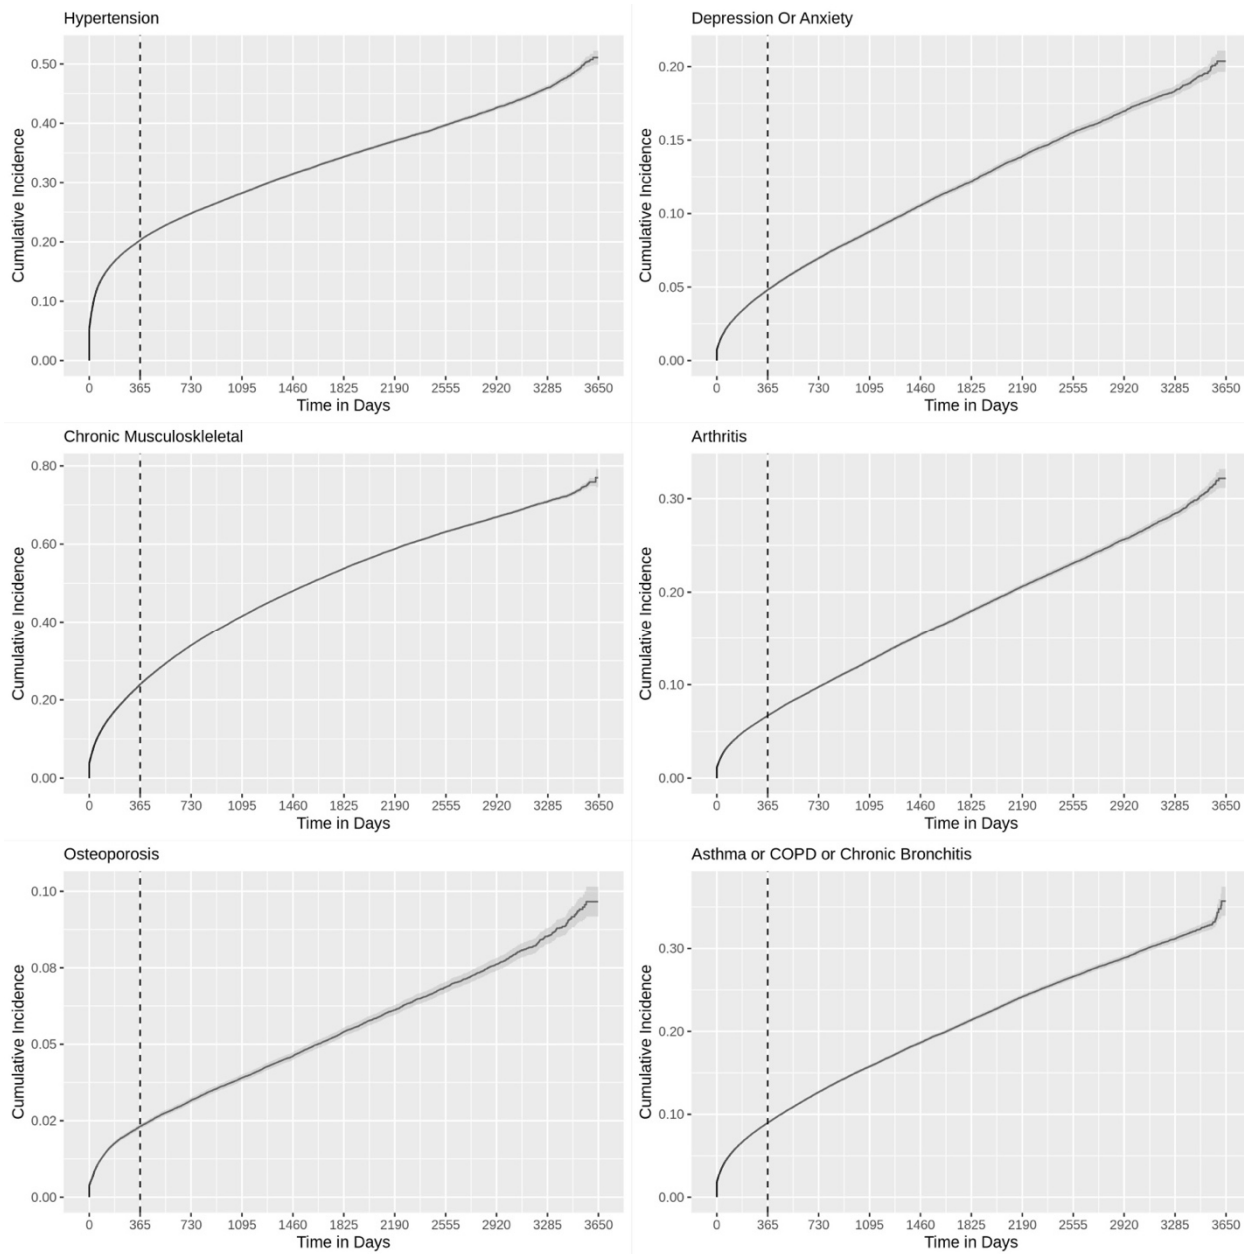

640

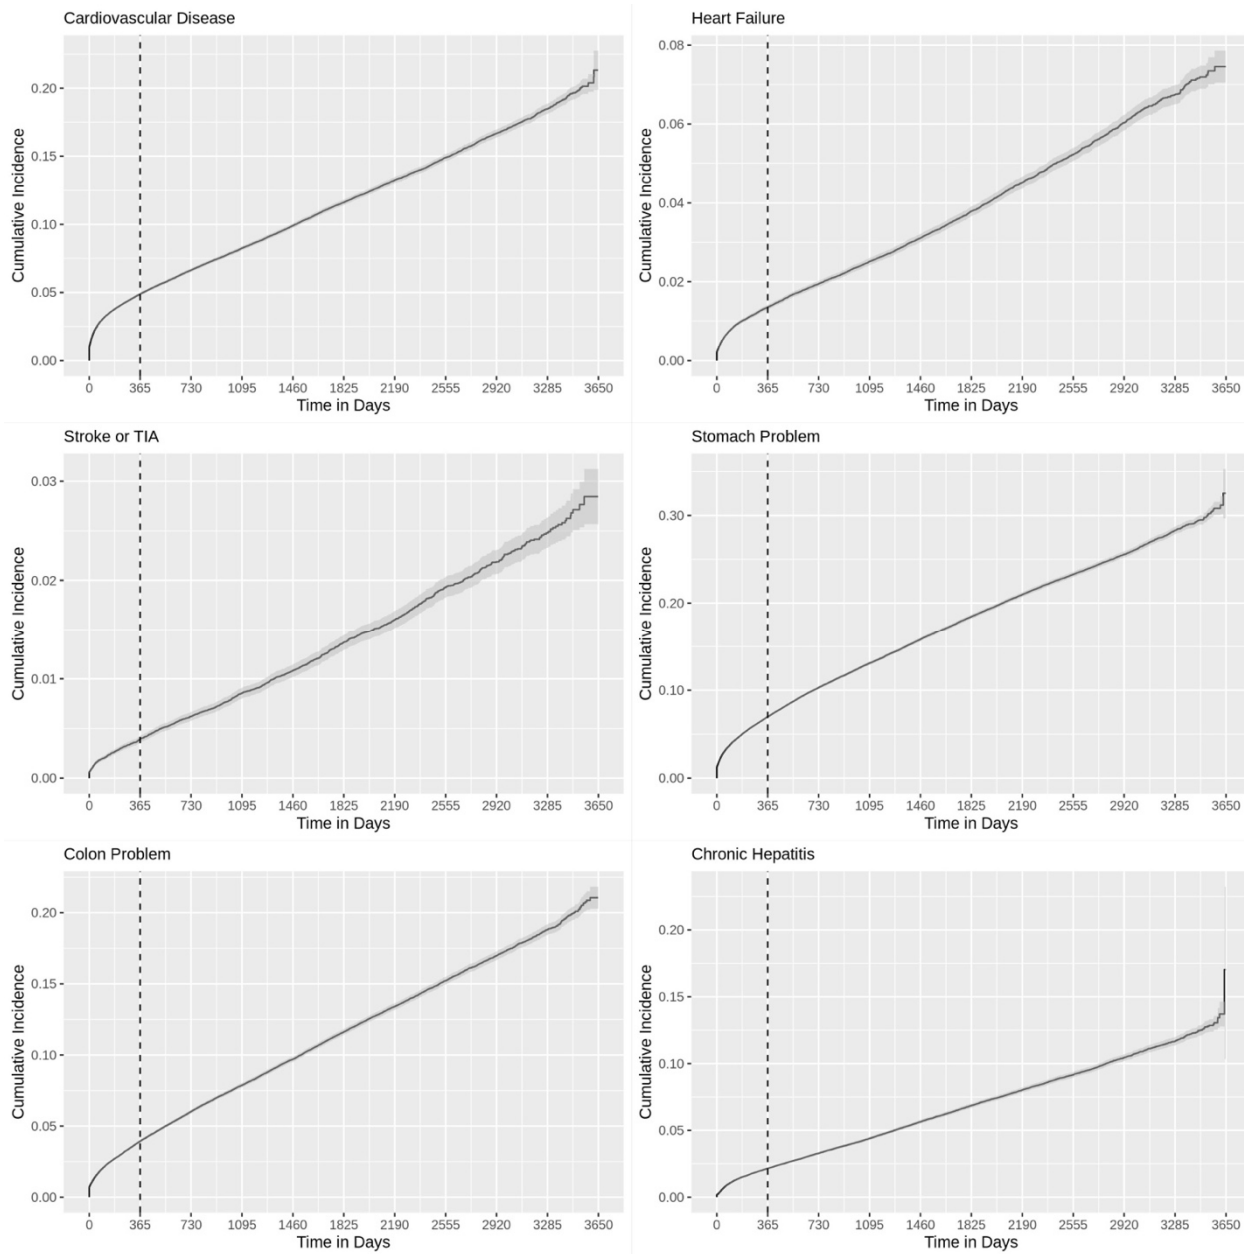

641

642

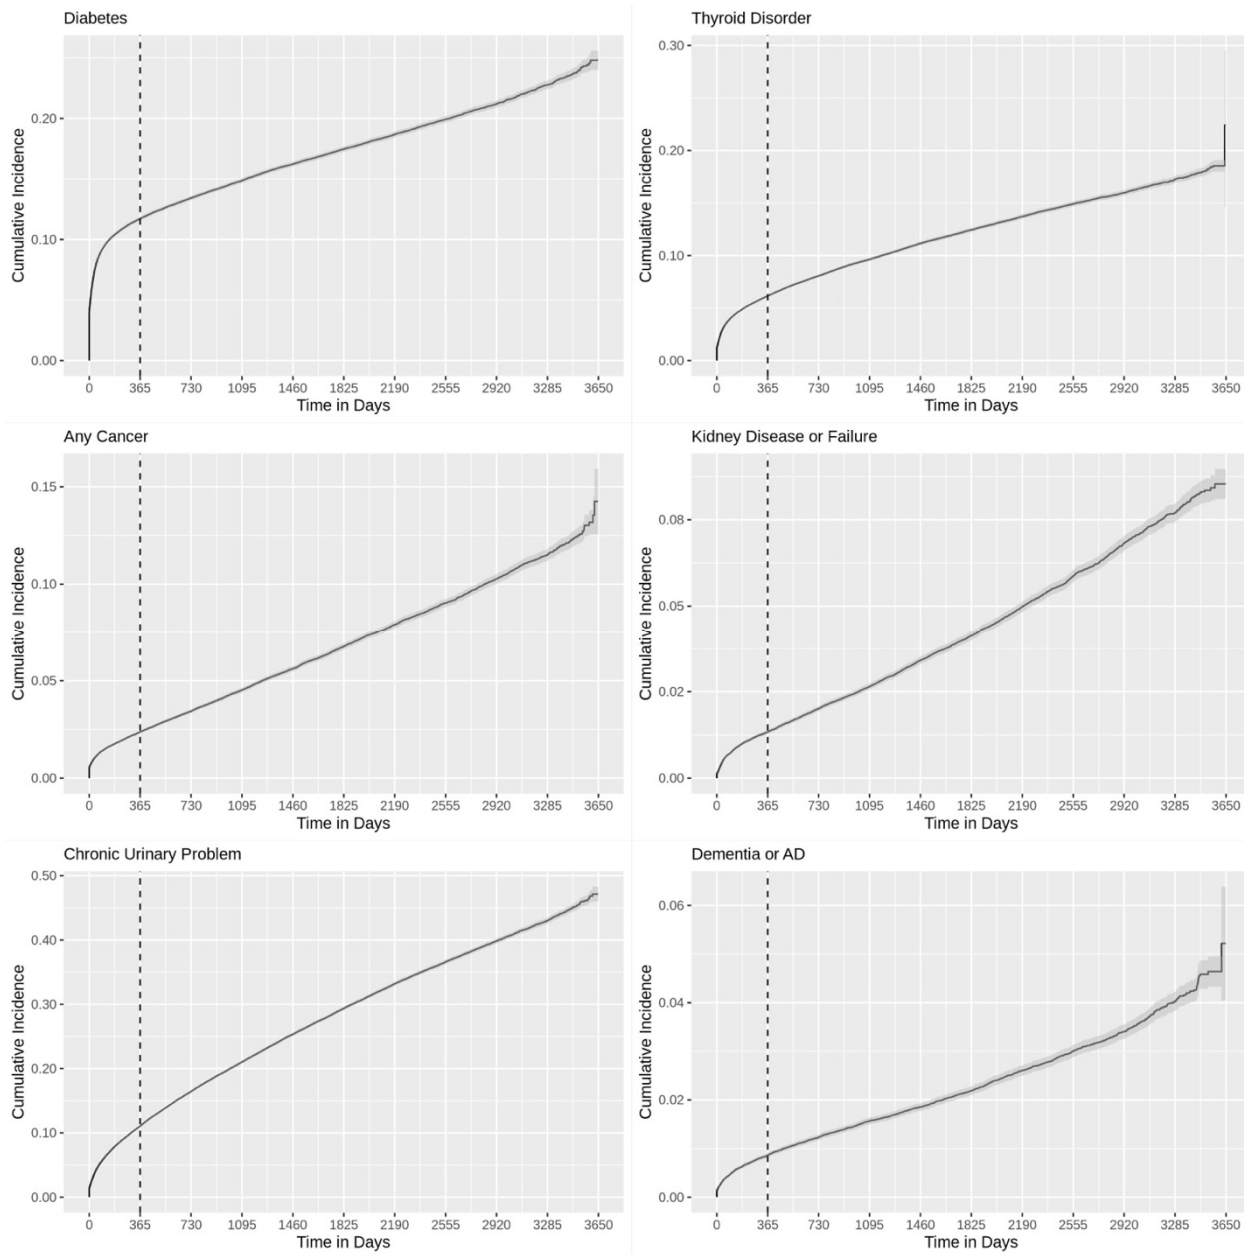

643

644

645

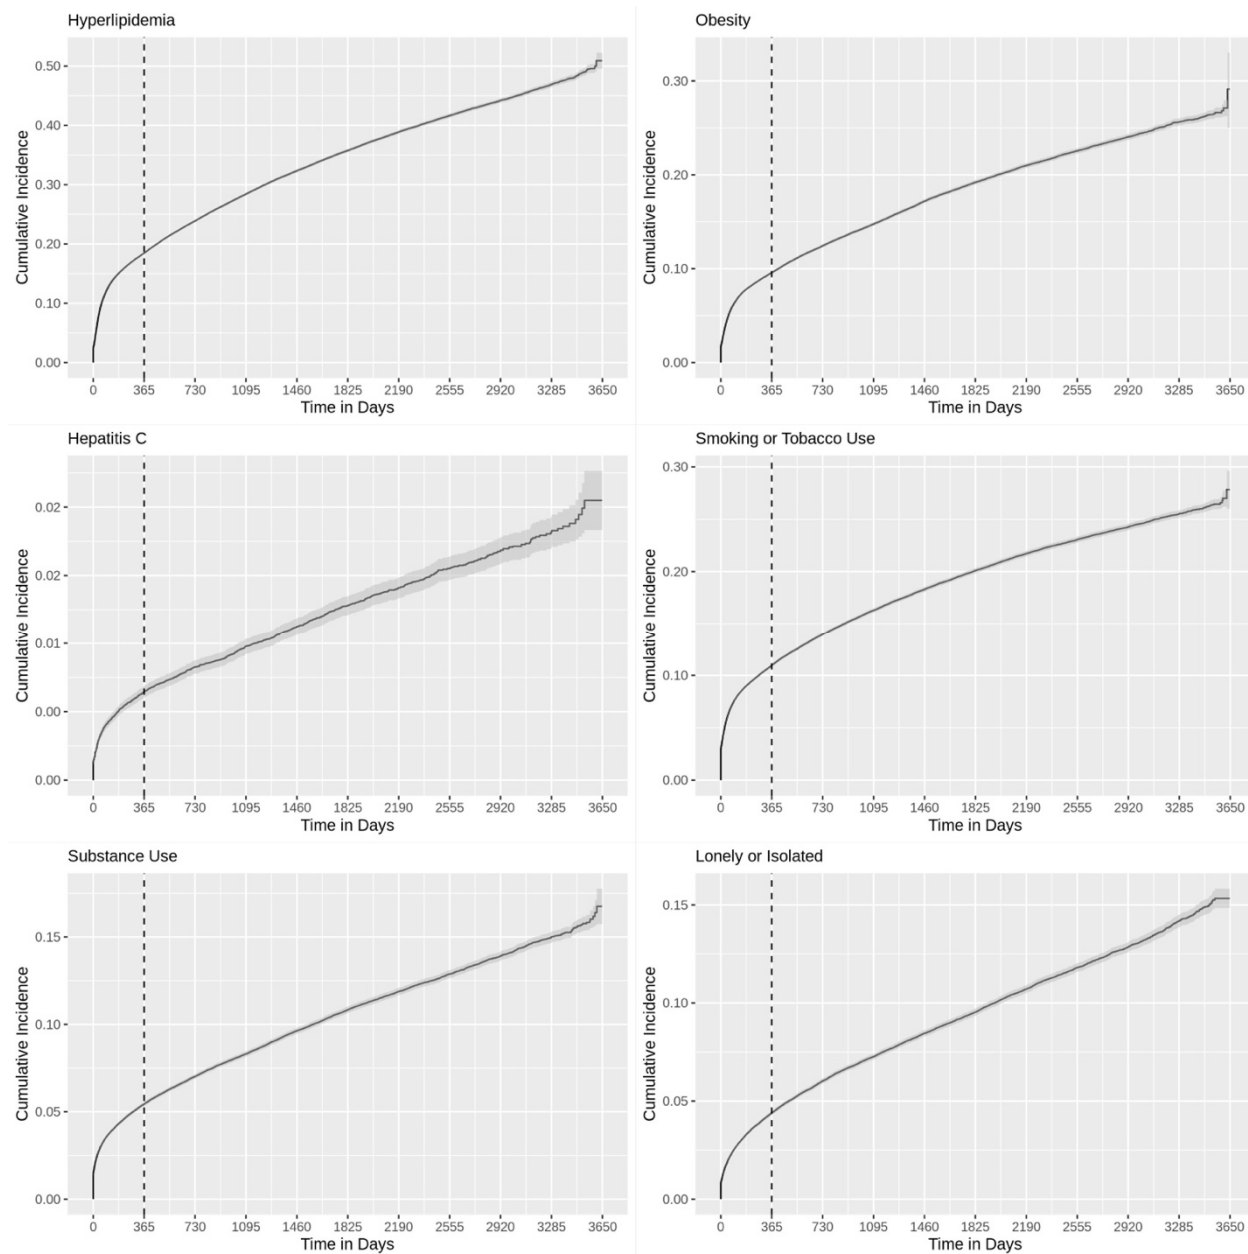

646  
647 **Figure S3: Cumulative incidence** Cumulative incidence plots by days of observation since the  
648 first recorded event. Clients eligible for this analysis must not have any care recorded in the first  
649 calendar-year of available data (2009).  
650



651 **Appendix 2**

652 **The RECORD statement – checklist of items, extended from the STROBE statement, that should be reported in observational**  
 653 **studies using routinely collected health data.**

|                           | <b>Item No.</b> | <b>STROBE items</b>                                                                                                                                                                        | <b>Location in manuscript where items are reported</b> | <b>RECORD items</b>                                                                                                                                                                                                                                                                                                                                                                                                                                | <b>Location in manuscript where items are reported</b> |
|---------------------------|-----------------|--------------------------------------------------------------------------------------------------------------------------------------------------------------------------------------------|--------------------------------------------------------|----------------------------------------------------------------------------------------------------------------------------------------------------------------------------------------------------------------------------------------------------------------------------------------------------------------------------------------------------------------------------------------------------------------------------------------------------|--------------------------------------------------------|
| <b>Title and abstract</b> |                 |                                                                                                                                                                                            |                                                        |                                                                                                                                                                                                                                                                                                                                                                                                                                                    |                                                        |
|                           | 1               | (a) Indicate the study’s design with a commonly used term in the title or the abstract (b) Provide in the abstract an informative and balanced summary of what was done and what was found | Abstract                                               | <p>RECORD 1.1: The type of data used should be specified in the title or abstract. When possible, the name of the databases used should be included.</p> <p>RECORD 1.2: If applicable, the geographic region and timeframe within which the study took place should be reported in the title or abstract.</p> <p>RECORD 1.3: If linkage between databases was conducted for the study, this should be clearly stated in the title or abstract.</p> | Abstract                                               |
| <b>Introduction</b>       |                 |                                                                                                                                                                                            |                                                        |                                                                                                                                                                                                                                                                                                                                                                                                                                                    |                                                        |
| Background rationale      | 2               | Explain the scientific background and rationale for the investigation being reported                                                                                                       | Introduction                                           |                                                                                                                                                                                                                                                                                                                                                                                                                                                    | Introduction                                           |
| Objectives                | 3               | State specific objectives, including any prespecified hypotheses                                                                                                                           | Introduction                                           |                                                                                                                                                                                                                                                                                                                                                                                                                                                    | Introduction                                           |
| <b>Methods</b>            |                 |                                                                                                                                                                                            |                                                        |                                                                                                                                                                                                                                                                                                                                                                                                                                                    |                                                        |
| Study Design              | 4               | Present key elements of study                                                                                                                                                              | Introduction,                                          |                                                                                                                                                                                                                                                                                                                                                                                                                                                    | Introduction,                                          |

|              |   |                                                                                                                                                                                                                                                                                                                                                                                                                                                                                                                                                                                                           |                                                                                                                                     |                                                                                                                                                                                                                                                                                                                                                                                                                                                                                                                                                                                                                                                          |                                                                                                                                     |
|--------------|---|-----------------------------------------------------------------------------------------------------------------------------------------------------------------------------------------------------------------------------------------------------------------------------------------------------------------------------------------------------------------------------------------------------------------------------------------------------------------------------------------------------------------------------------------------------------------------------------------------------------|-------------------------------------------------------------------------------------------------------------------------------------|----------------------------------------------------------------------------------------------------------------------------------------------------------------------------------------------------------------------------------------------------------------------------------------------------------------------------------------------------------------------------------------------------------------------------------------------------------------------------------------------------------------------------------------------------------------------------------------------------------------------------------------------------------|-------------------------------------------------------------------------------------------------------------------------------------|
|              |   | design early in the paper                                                                                                                                                                                                                                                                                                                                                                                                                                                                                                                                                                                 | Methods – Study population and data source                                                                                          |                                                                                                                                                                                                                                                                                                                                                                                                                                                                                                                                                                                                                                                          | Methods – Study population and data source                                                                                          |
| Setting      | 5 | Describe the setting, locations, and relevant dates, including periods of recruitment, exposure, follow-up, and data collection                                                                                                                                                                                                                                                                                                                                                                                                                                                                           | Methods – Study population and data source; additional details specific to analyses are presented under the appropriate sub-heading |                                                                                                                                                                                                                                                                                                                                                                                                                                                                                                                                                                                                                                                          | Methods – Study population and data source; additional details specific to analyses are presented under the appropriate sub-heading |
| Participants | 6 | <p>(a) <i>Cohort study</i> - Give the eligibility criteria, and the sources and methods of selection of participants. Describe methods of follow-up</p> <p><i>Case-control study</i> - Give the eligibility criteria, and the sources and methods of case ascertainment and control selection. Give the rationale for the choice of cases and controls</p> <p><i>Cross-sectional study</i> - Give the eligibility criteria, and the sources and methods of selection of participants</p> <p>(b) <i>Cohort study</i> - For matched studies, give matching criteria and number of exposed and unexposed</p> | Methods                                                                                                                             | <p>RECORD 6.1: The methods of study population selection (such as codes or algorithms used to identify subjects) should be listed in detail. If this is not possible, an explanation should be provided.</p> <p>RECORD 6.2: Any validation studies of the codes or algorithms used to select the population should be referenced. If validation was conducted for this study and not published elsewhere, detailed methods and results should be provided.</p> <p>RECORD 6.3: If the study involved linkage of databases, consider use of a flow diagram or other graphical display to demonstrate the data linkage process, including the number of</p> | Methods                                                                                                                             |

|                              |    |                                                                                                                                                                                              |                                 |                                                                                                                                                                                                                 |                                 |
|------------------------------|----|----------------------------------------------------------------------------------------------------------------------------------------------------------------------------------------------|---------------------------------|-----------------------------------------------------------------------------------------------------------------------------------------------------------------------------------------------------------------|---------------------------------|
|                              |    | <i>Case-control study</i> - For matched studies, give matching criteria and the number of controls per case                                                                                  |                                 | individuals with linked data at each stage.                                                                                                                                                                     |                                 |
| Variables                    | 7  | Clearly define all outcomes, exposures, predictors, potential confounders, and effect modifiers. Give diagnostic criteria, if applicable.                                                    | Methods, Supplementary Table S1 | RECORD 7.1: A complete list of codes and algorithms used to classify exposures, outcomes, confounders, and effect modifiers should be provided. If these cannot be reported, an explanation should be provided. | Supplementary Table S1          |
| Data sources/<br>measurement | 8  | For each variable of interest, give sources of data and details of methods of assessment (measurement). Describe comparability of assessment methods if there is more than one group         | Methods, Supplementary Table S1 |                                                                                                                                                                                                                 | Methods, Supplementary Table S1 |
| Bias                         | 9  | Describe any efforts to address potential sources of bias                                                                                                                                    | N/A                             |                                                                                                                                                                                                                 | N/A                             |
| Study size                   | 10 | Explain how the study size was arrived at                                                                                                                                                    | Methods                         |                                                                                                                                                                                                                 | Methods                         |
| Quantitative variables       | 11 | Explain how quantitative variables were handled in the analyses. If applicable, describe which groupings were chosen, and why                                                                | Methods, Supplementary Table S1 |                                                                                                                                                                                                                 | Methods, Supplementary Table S1 |
| Statistical methods          | 12 | (a) Describe all statistical methods, including those used to control for confounding<br>(b) Describe any methods used to examine subgroups and interactions<br>(c) Explain how missing data | Methods                         |                                                                                                                                                                                                                 | Methods                         |

|                                  |    |                                                                                                                                                                                                                                                                                                                                                                                                |                          |                                                                                                                                                                                                                                                                     |                                 |
|----------------------------------|----|------------------------------------------------------------------------------------------------------------------------------------------------------------------------------------------------------------------------------------------------------------------------------------------------------------------------------------------------------------------------------------------------|--------------------------|---------------------------------------------------------------------------------------------------------------------------------------------------------------------------------------------------------------------------------------------------------------------|---------------------------------|
|                                  |    | <p>were addressed</p> <p>(d) <i>Cohort study</i> - If applicable, explain how loss to follow-up was addressed</p> <p><i>Case-control study</i> - If applicable, explain how matching of cases and controls was addressed</p> <p><i>Cross-sectional study</i> - If applicable, describe analytical methods taking account of sampling strategy</p> <p>(e) Describe any sensitivity analyses</p> |                          |                                                                                                                                                                                                                                                                     |                                 |
| Data access and cleaning methods |    | ..                                                                                                                                                                                                                                                                                                                                                                                             |                          | <p>RECORD 12.1: Authors should describe the extent to which the investigators had access to the database population used to create the study population.</p> <p>RECORD 12.2: Authors should provide information on the data cleaning methods used in the study.</p> | Methods, Supplementary Table S1 |
| Linkage                          |    | ..                                                                                                                                                                                                                                                                                                                                                                                             |                          | RECORD 12.3: State whether the study included person-level, institutional-level, or other data linkage across two or more databases. The methods of linkage and methods of linkage quality evaluation should be provided.                                           | No linkage                      |
| <b>Results</b>                   |    |                                                                                                                                                                                                                                                                                                                                                                                                |                          |                                                                                                                                                                                                                                                                     |                                 |
| Participants                     | 13 | (a) Report the numbers of individuals at each stage of the                                                                                                                                                                                                                                                                                                                                     | Supplementary Appendix 3 | RECORD 13.1: Describe in detail the selection of the persons included in the                                                                                                                                                                                        | Methods                         |

|                  |    |                                                                                                                                                                                                                                                                                                                                                            |                                   |                                                                                                                                                                                                                                            |  |
|------------------|----|------------------------------------------------------------------------------------------------------------------------------------------------------------------------------------------------------------------------------------------------------------------------------------------------------------------------------------------------------------|-----------------------------------|--------------------------------------------------------------------------------------------------------------------------------------------------------------------------------------------------------------------------------------------|--|
|                  |    | <p>study (<i>e.g.</i>, numbers potentially eligible, examined for eligibility, confirmed eligible, included in the study, completing follow-up, and analysed)</p> <p>(b) Give reasons for non-participation at each stage.</p> <p>(c) Consider use of a flow diagram</p>                                                                                   |                                   | <p>study (<i>i.e.</i>, study population selection) including filtering based on data quality, data availability and linkage. The selection of included persons can be described in the text and/or by means of the study flow diagram.</p> |  |
| Descriptive data | 14 | <p>(a) Give characteristics of study participants (<i>e.g.</i>, demographic, clinical, social) and information on exposures and potential confounders</p> <p>(b) Indicate the number of participants with missing data for each variable of interest</p> <p>(c) <i>Cohort study</i> - summarise follow-up time (<i>e.g.</i>, average and total amount)</p> | Results, Supplementary Appendix 3 |                                                                                                                                                                                                                                            |  |
| Outcome data     | 15 | <p><i>Cohort study</i> - Report numbers of outcome events or summary measures over time</p> <p><i>Case-control study</i> - Report numbers in each exposure category, or summary measures of exposure</p> <p><i>Cross-sectional study</i> - Report numbers of outcome events or summary measures</p>                                                        | Results, Supplementary Appendix 3 |                                                                                                                                                                                                                                            |  |
| Main results     | 16 | <p>(a) Give unadjusted estimates and, if applicable, confounder-adjusted estimates and their</p>                                                                                                                                                                                                                                                           | Results, Supplementary Appendix 3 |                                                                                                                                                                                                                                            |  |

|                   |    |                                                                                                                                                                                                                                                                                                                       |                                     |                                                                                                                                                                                                                                                                                                          |            |
|-------------------|----|-----------------------------------------------------------------------------------------------------------------------------------------------------------------------------------------------------------------------------------------------------------------------------------------------------------------------|-------------------------------------|----------------------------------------------------------------------------------------------------------------------------------------------------------------------------------------------------------------------------------------------------------------------------------------------------------|------------|
|                   |    | precision (e.g., 95% confidence interval). Make clear which confounders were adjusted for and why they were included<br>(b) Report category boundaries when continuous variables were categorized<br>(c) If relevant, consider translating estimates of relative risk into absolute risk for a meaningful time period |                                     |                                                                                                                                                                                                                                                                                                          |            |
| Other analyses    | 17 | Report other analyses done— e.g., analyses of subgroups and interactions, and sensitivity analyses                                                                                                                                                                                                                    | Results, Supplementary Appendix 1,3 |                                                                                                                                                                                                                                                                                                          |            |
| <b>Discussion</b> |    |                                                                                                                                                                                                                                                                                                                       |                                     |                                                                                                                                                                                                                                                                                                          |            |
| Key results       | 18 | Summarise key results with reference to study objectives                                                                                                                                                                                                                                                              | Discussion                          |                                                                                                                                                                                                                                                                                                          | Discussion |
| Limitations       | 19 | Discuss limitations of the study, taking into account sources of potential bias or imprecision. Discuss both direction and magnitude of any potential bias                                                                                                                                                            | Discussion                          | RECORD 19.1: Discuss the implications of using data that were not created or collected to answer the specific research question(s). Include discussion of misclassification bias, unmeasured confounding, missing data, and changing eligibility over time, as they pertain to the study being reported. | Discussion |
| Interpretation    | 20 | Give a cautious overall interpretation of results considering objectives, limitations, multiplicity of analyses, results from similar studies, and other relevant                                                                                                                                                     | Discussion                          |                                                                                                                                                                                                                                                                                                          | Discussion |



|                                                           |    |                                                                                                                                                               |              |                                                                                                                                                          |                                                                         |
|-----------------------------------------------------------|----|---------------------------------------------------------------------------------------------------------------------------------------------------------------|--------------|----------------------------------------------------------------------------------------------------------------------------------------------------------|-------------------------------------------------------------------------|
|                                                           |    | evidence                                                                                                                                                      |              |                                                                                                                                                          |                                                                         |
| Generalisability                                          | 21 | Discuss the generalisability (external validity) of the study results                                                                                         | N/A          |                                                                                                                                                          | N/A                                                                     |
| <b>Other Information</b>                                  |    |                                                                                                                                                               |              |                                                                                                                                                          |                                                                         |
| Funding                                                   | 22 | Give the source of funding and the role of the funders for the present study and, if applicable, for the original study on which the present article is based | Declarations |                                                                                                                                                          | Declarations                                                            |
| Accessibility of protocol, raw data, and programming code |    | ..                                                                                                                                                            |              | RECORD 22.1: Authors should provide information on how to access any supplemental information such as the study protocol, raw data, or programming code. | Given the sensitive nature of the data, this information is not shared. |

654

655

656 **Appendix 3**

657 **Eligible Clients:** Of the 881 129 adult clients in the Alliance EHR database in 2009-2019, 232,529 (26.4%) have ongoing primary care client indications, and  
 658 221,047 (25.1%) have at least one encounter in 2009-2019 (fully eligible).

659

660 **Table S1: Characteristic variable definitions**

| Variable Name                           | Definition                                                                                                                                                                                                                                                                                                                                                                                   | Source used to guide variable operationalization, if any                 |
|-----------------------------------------|----------------------------------------------------------------------------------------------------------------------------------------------------------------------------------------------------------------------------------------------------------------------------------------------------------------------------------------------------------------------------------------------|--------------------------------------------------------------------------|
| <b>Sociodemographic Characteristics</b> |                                                                                                                                                                                                                                                                                                                                                                                              |                                                                          |
| Age in 2015                             | 2015 minus Year of Birth                                                                                                                                                                                                                                                                                                                                                                     |                                                                          |
| Geography                               | Geography of place of residence based on Forward Sortation Area: Rural if second digit is 0; Urban if any other valid digit; NA otherwise.                                                                                                                                                                                                                                                   | (1)                                                                      |
| Sex                                     | Categories as recorded in client characteristic table                                                                                                                                                                                                                                                                                                                                        |                                                                          |
| Gender                                  | Collapsed client characteristic table categories                                                                                                                                                                                                                                                                                                                                             | (2)                                                                      |
| Sexual Orientation                      | Categories as recorded in client characteristic table                                                                                                                                                                                                                                                                                                                                        |                                                                          |
| Highest Level of Education Completed    | Collapsed client characteristic table categories                                                                                                                                                                                                                                                                                                                                             | (2) followed to the extent possible                                      |
| Primary Spoken Language                 | Collapsed client characteristic table categories into the two official languages of Canada with remaining languages categorized as Other.                                                                                                                                                                                                                                                    |                                                                          |
| Race and Ethnicity                      | Collapsed client characteristic table categories                                                                                                                                                                                                                                                                                                                                             | (3,4)                                                                    |
| Year Since Arrival in Canada            | Cleaned free text entries from client characteristic table and collapsed into 5 years, 6 or more year, and None Recorded categories. None Recorded cannot differentiate between never-immigrated and never-asked.                                                                                                                                                                            |                                                                          |
| Household Income                        | Collapsed client characteristic table categories                                                                                                                                                                                                                                                                                                                                             | Note: could not reliably follow guidelines in (2)                        |
| Household Composition                   | Categories as recorded in client characteristic table                                                                                                                                                                                                                                                                                                                                        |                                                                          |
| Stable Residence                        | Collapsed client characteristic table categories into Stable or Unstable (homeless, shelter, other temporary). Additional unstable residence situations were identified as the presence of at least one ENCODE-FM code: 8990, 9433, 9434, 9435, 9436, 9437, 9438, 9439, 9440, 9441, 9442, 9443, 9432, 8982, 8986, 9419, 9424, 8985, 9431, 9415, 9425, 9412, 9414, which were given priority. | List of codes are from an Alliance for Healthier Communities stakeholder |
| Food Insecurity                         | At least one ENCODE-FM code: 8972, 9782, 9802, 8971, 9568, 9805                                                                                                                                                                                                                                                                                                                              | List of codes are from an Alliance for Healthier Communities stakeholder |
| <b>Clinical Characteristics</b>         |                                                                                                                                                                                                                                                                                                                                                                                              |                                                                          |
| Hypertension                            | At least one ICD-10 code: i10,i11,i12,i13,i14,i15                                                                                                                                                                                                                                                                                                                                            | (5)                                                                      |

|                                                                                                                  |                                                                                                                                                                                                                                                                                                                                                                                                                                      |                                                                                                         |
|------------------------------------------------------------------------------------------------------------------|--------------------------------------------------------------------------------------------------------------------------------------------------------------------------------------------------------------------------------------------------------------------------------------------------------------------------------------------------------------------------------------------------------------------------------------|---------------------------------------------------------------------------------------------------------|
| Depression or Anxiety                                                                                            | At least one ICD-10 code: f33,f40,f41                                                                                                                                                                                                                                                                                                                                                                                                | (5)                                                                                                     |
| Chronic Musculoskeletal Conditions causing pain or limitation                                                    | At least one ICD-10 code:<br>m40,m41,m42,m43,m44,m45,m46,m47,m48,m49,m50,m51,m52,m53,m54,m60,m61,m62,m63,m65,m66,m67,m68,m70,m71,m72,m73,m74,m75,m76,m77,m78,m79                                                                                                                                                                                                                                                                     | (5)                                                                                                     |
| Arthritis and/or Rheumatoid Arthritis                                                                            | At least one ICD-10 code: m05.9,m13.0,m13.9,m15,m16,m17,m18,m19                                                                                                                                                                                                                                                                                                                                                                      | (5)                                                                                                     |
| Osteoporosis                                                                                                     | At least one ICD-10 code: m81                                                                                                                                                                                                                                                                                                                                                                                                        | (5)                                                                                                     |
| Asthma, Chronic Obstructive Pulmonary Disease, or Chronic Bronchitis                                             | At least one ICD-10 code: j40,j41,j42,j43,j44,j45,j46                                                                                                                                                                                                                                                                                                                                                                                | (5)                                                                                                     |
| Cardiovascular Disease (angina, myocardial infarction, atrial fibrillation, poor circulation in the lower limbs) | At least one ICD-10 code: i20,i25,i48,i70,i71,i72,i73,i74,i75,i76,i77,i78,i79                                                                                                                                                                                                                                                                                                                                                        | (5)                                                                                                     |
| Heart Failure (including valve problems or replacement)                                                          | At least one ICD-10 code: i05,i06,i07,i08,i09,i34,i35,i36,i37,i38,i39,i42,i43,i50                                                                                                                                                                                                                                                                                                                                                    | (5)                                                                                                     |
| Stroke and Transient Ischemic Attack                                                                             | At least one ICD-10 code: g45,i62                                                                                                                                                                                                                                                                                                                                                                                                    | (5)                                                                                                     |
| Stomach Problem (irritable bowel, Chron's disease, ulcerative colitis, diverticulosis)                           | At least one ICD-10 code: k21,k25.7,k29.5                                                                                                                                                                                                                                                                                                                                                                                            | (5)                                                                                                     |
| Colon Problem                                                                                                    | At least one ICD-10 code: k50,k51,k52,k57,k58                                                                                                                                                                                                                                                                                                                                                                                        | (5)                                                                                                     |
| Chronic Hepatitis                                                                                                | At least one ICD-10 code: k70,k71,k72,k73,k74,k75,k76,k77                                                                                                                                                                                                                                                                                                                                                                            | (5)                                                                                                     |
| Diabetes                                                                                                         | At least one ICD-10 code: e10,e11,e12,e13,e14                                                                                                                                                                                                                                                                                                                                                                                        | (5)                                                                                                     |
| Thyroid Disorder                                                                                                 | At least one ICD-10 code: e00,e01,e02,e03,e04,e05,e06,e07                                                                                                                                                                                                                                                                                                                                                                            | (5)                                                                                                     |
| Any Cancer (including melanoma, but excluding other skin cancers)                                                | At least one ICD-10 code:<br>c00,c01,c02,c03,c04,c05,c06,c07,c08,c09,c10,c11,c12,c13,c14,c15,c16,c17,c18,c19,c20,c21,c22,c23,c24,c25,c26,c27,c28,c29,c30,c31,c32,c33,c34,c35,c36,c37,c38,c39,c40,c41,c42,c43,c44,c45,c46,c47,c48,c49,c50,c51,c52,c53,c54,c55,c56,c57,c58,c59,c60,c61,c62,c63,c64,c65,c66,c67,c68,c69,c70,c71,c72,c73,c74,c75,c76,c77,c78,c79,c80,c81,c82,c83,c84,c85,c86,c87,c88,c89,c90,c91,c92,c93,c94,c95,c96,c97 | (5) modified by removing the 5 year restriction; taking any cancer indication within the 10 year period |
| Kidney Disease or Failure                                                                                        | At least one ICD-10 code: n18,n19                                                                                                                                                                                                                                                                                                                                                                                                    | (5)                                                                                                     |
| Chronic Urinary Problem                                                                                          | At least one ICD-10 code:<br>n03,n11,n18,n20,n21,n22,n23,n25,n26,27,n28,n29,n30,n31,n32,n33,n34,n35,n36,n37,n38,n39,n40,n41,n42,n43,n44,n45,n46,n47,n48,n49,n50,n51+B38                                                                                                                                                                                                                                                              | (5)                                                                                                     |
| Dementia or Alzheimer's Disease                                                                                  | At least one ICD-10 code: f00,f01,f02,f03                                                                                                                                                                                                                                                                                                                                                                                            | (5)                                                                                                     |
| Hyperlipidemia (high cholesterol)                                                                                | At least one ICD-10 code: e78                                                                                                                                                                                                                                                                                                                                                                                                        | (5)                                                                                                     |
| Obesity                                                                                                          | At least one ICD-10 code: e66                                                                                                                                                                                                                                                                                                                                                                                                        | (5) ICD-10 only; no BMI                                                                                 |

|                        |                                                                                                                                                                                                                                                                                                                                                                                                                                                                                                                                                                                                                                                                                                                                                                                                                                                                                                                                                                                      |                                                                          |
|------------------------|--------------------------------------------------------------------------------------------------------------------------------------------------------------------------------------------------------------------------------------------------------------------------------------------------------------------------------------------------------------------------------------------------------------------------------------------------------------------------------------------------------------------------------------------------------------------------------------------------------------------------------------------------------------------------------------------------------------------------------------------------------------------------------------------------------------------------------------------------------------------------------------------------------------------------------------------------------------------------------------|--------------------------------------------------------------------------|
| Hepatitis C            | At least one ICD-10 code: b18.2,b19.20,b19.21                                                                                                                                                                                                                                                                                                                                                                                                                                                                                                                                                                                                                                                                                                                                                                                                                                                                                                                                        | (6)                                                                      |
| Smoking or Tobacco Use | At least one ENCODE-FM code:<br>10072,5520,679,9910,5339,5340,5341,5342,5343,5344,5345,5346,5347,5348,5349                                                                                                                                                                                                                                                                                                                                                                                                                                                                                                                                                                                                                                                                                                                                                                                                                                                                           | JKK selected relevant ENCODE-FM codes based on manual review             |
| Substance Use          | At least one ENCODE-FM code:<br>5304,10004,10005,5305,5306,5307,9754,5308,5309,5310,5311,5312,5313,5314,5315,5316,5317,5318,5319,5320,5321,5322,5323,5324,5325,5326,5327,5328,5329,5330,5331,5332,5333,5334,5335,5336,5337,5338,5350,5351,5352,5353,5354,5355,5356,5357,5358,5359,5360,5361,5362,5363,5364,5365,5366,5367,5368,5369,5370,5371,10007,5372,5373,5374,5375,5376,5377,5378,5379,5380,5381,5382,5383,5384,5385,5386,5387,5388,5389,5390,5391,5392,5393,5394,5395,5396,5397,5398,5399,5400,9845,5401,9844,5401,5402,5403,5404,5405,5406,5407,5408,5409,5410,5411,5412,5413,5414,5415,5416,5417,5418,5419,5420,5421,5422,5423,5424,5425,5426,5427,5428,5429,5430,5431,5432,5433,5434,5435,5436,5437,5438,5439,5440,5441,5442,5443,5444,5445,5446,5447,5448,5449,9277,9278,5450,5451,5452,5453,5454,5455,5456,5457,5458,5459,5460,5461,5462,5463,5464,5465,5466,5467,5468,5469,5470,5471,5472,5473,5474,5475,5476,5477,5478,5479,5480,5481 or recorded in Disabilities Table | JKK selected relevant ENCODE-FM codes based on manual review             |
| Lonely or Isolated     | At least one ENCODE-FM code: 5138, 5139, 9265, 9267, 9268, 9512                                                                                                                                                                                                                                                                                                                                                                                                                                                                                                                                                                                                                                                                                                                                                                                                                                                                                                                      | List of codes are from an Alliance for Healthier Communities stakeholder |

---

**Health Care Use Characteristics**

---

|                        |                                                                                                                                                                     |
|------------------------|---------------------------------------------------------------------------------------------------------------------------------------------------------------------|
| # Years of Observation | Based on records in the service event table: Ceiling of number of days from first to last recorded event divided by 365.25                                          |
| # Provider Types Seen  | Number of unique provider types recorded in providers involved table. Provider types were maintained as entered except Other, Unknown, and Undefined were collapsed |
| # Internal Referrals   | Number of records in the internal referrals table                                                                                                                   |
| # External Referrals   | Number of records in the external referrals table                                                                                                                   |
| Avg. # Days per Year   | Based on records in the service event table: Sum of unique calendar days with at least one event recorded divided by Number of Years of Observation                 |
| Max # Days per Year    | Based on records in the service event table: Maximum of number of unique calendar days care is accessed in a single calendar year                                   |
| Avg. # Events per Day  | Based on records in the service event table: Sum of events divided by number of calendar days care is accessed at least once                                        |
| Max # Events per Day   | Based on records in the service event table: Maximum number of events recorded in a single calendar day                                                             |

662 *Legend:* # = Number; Avg. = Average; CHC = Community Health Centre; ENCODE-FM = Electronic Nomenclature and Classification Of Disorders and  
 663 Encounters for Family Medicine; ICD = International Classification of Disease; SD = Standard Deviation; UAR = Urban at Risk.  
 664 *References:* (1) Canada Post. Addressing guidelines - Forward Sortation Area (FSA) [Internet]. Canada Post. 2022 [cited 2022 Feb 8]. Available from: [https://www.canadapost-](https://www.canadapost-postescanada.ca/cpc/en/support/articles/addressing-guidelines/postal-codes.page)  
 665 [postescanada.ca/cpc/en/support/articles/addressing-guidelines/postal-codes.page](https://www.canadapost-postescanada.ca/cpc/en/support/articles/addressing-guidelines/postal-codes.page) (2) CIHI. In Pursuit of Health Equity: Defining Stratifiers for Measuring Health Inequality - A Focus on Age, Sex, Gender, Income, Education and Geographic Location. Ottawa, ON: Canadian Institute for Health Information; 2018 Apr. Available from:  
 666 <https://www.cihi.ca/sites/default/files/document/defining-stratifiers-measuring-health-inequalities-2018-en-web.pdf> (3) CIHI. Proposed Standards for Race-Based and Indigenous Identity  
 667 Data Collection and Health Reporting in Canada. Ottawa, ON: Canadian Institute for Health Information; 2020. Available from: [https://www.cihi.ca/en/proposed-standards-for-race-based-](https://www.cihi.ca/en/proposed-standards-for-race-based-and-indigenous-identity-data)  
 668 [and-indigenous-identity-data](https://www.cihi.ca/en/proposed-standards-for-race-based-and-indigenous-identity-data) (4) Flanagan A, Frey T, Christiansen SL, AMA Manual of Style Committee. Updated guidance on the reporting of race and ethnicity in medical and science journals. JAMA. 2021 Aug 17;326(7):621–7. (5) Fortin M, Almirall J, Nicholson K. Development of a research tool to document self-reported chronic conditions in primary care. J Comorb. 2017 Jan 1;7(1):117–23. (6) Support Path. Hepatitis C ICD-10 Codes. Gilead Sciences; 2015 [cited 2020 Sep 25]. Available from: <https://www.cvph.org/data/files/mysupportpath.pdf>

**Table S2: Sociodemographic characteristics with sub-strata**

| Characteristic    | Values         | All Clients<br>n (%) | UAR & MM<br>n (%) | UAR & Non-<br>MM<br>n (%) | Non-UAR &<br>MM<br>n (%) | Non-UAR & Non-<br>MM<br>n (%) |
|-------------------|----------------|----------------------|-------------------|---------------------------|--------------------------|-------------------------------|
| Number of clients |                | 221 047              | 19 237            | 16761                     | 83 935                   | 101 114                       |
| Age in 2015       | 25-34          | 55 505 (25.11)       | 1864 (9.69)       | 6112 (36.47)              | 7482 (8.91)              | 40 047 (39.61)                |
|                   | 35-44          | 45 646 (20.65)       | 3154 (16.40)      | 4386 (26.17)              | 12 388 (14.76)           | 25 718 (25.43)                |
|                   | 45-54          | 44 653 (20.20)       | 4784 (24.87)      | 3402 (20.30)              | 19 198 (22.87)           | 17 269 (17.08)                |
|                   | 55-64          | 37 848 (17.12)       | 4935 (25.65)      | 1855 (11.07)              | 20 643 (24.59)           | 10 415 (10.30)                |
|                   | 65-74          | 23 162 (10.48)       | 2952 (15.35)      | 692 (4.13)                | 14 828 (17.67)           | 4690 (4.64)                   |
|                   | 75+            | 14 233 (6.44)        | 1548 (8.05)       | 314 (1.87)                | 9396 (11.19)             | 2975 (2.94)                   |
| Geography         | Rural          | 49 275 (22.29)       | 3479 (18.08)      | 2652 (15.82)              | 23 339 (27.81)           | 19 805 (19.59)                |
|                   | Urban          | 167 728<br>(75.88)   | 15 291<br>(79.49) | 13 247 (79.03)            | 59 720 (71.15)           | 79 470 (78.59)                |
|                   | Missing        | 4044 (1.83)          | 467 (2.43)        | 862 (5.14)                | 876 (1.04)               | 1839 (1.82)                   |
| Sex               | Female         | 127 070<br>(57.49)   | 10 647<br>(55.35) | 8052 (48.04)              | 49 299 (58.73)           | 59 072 (58.42)                |
|                   | Male           | 93 294 (42.21)       | 8561 (44.50)      | 8590 (51.25)              | 34 563 (41.18)           | 41 580 (41.12)                |
|                   | Other          | 331 (0.15)           | 3 (0.02)          | 40 (0.24)                 | 16 (0.02)                | 272 (0.27)                    |
|                   | Missing        | 352 (0.16)           | 26 (0.14)         | 79 (0.47)                 | 57 (0.07)                | 190 (0.19)                    |
| Gender            | Female         | 41 352 (18.71)       | 3352 (17.42)      | 2157 (12.87)              | 18 479 (22.02)           | 17 364 (17.17)                |
|                   | Gender diverse | 340 (0.15)           | 52 (0.27)         | 60 (0.36)                 | 92 (0.11)                | 136 (0.13)                    |
|                   | Male           | 29 366 (13.28)       | 2425 (12.61)      | 2160 (12.89)              | 12 308 (14.66)           | 12 473 (12.34)                |

|                            |                              |                    |                   |                |                |                |
|----------------------------|------------------------------|--------------------|-------------------|----------------|----------------|----------------|
|                            | Prefer not to answer         | 1001 (0.45)        | 37 (0.19)         | 14 (0.08)      | 339 (0.40)     | 611 (0.60)     |
|                            | Missing                      | 148 988<br>(67.40) | 13371 (69.51)     | 12 370 (73.80) | 52 717 (62.81) | 70 530 (69.75) |
| Sexual Orientation         | Bisexual                     | 1578 (0.71)        | 141 (0.73)        | 144 (0.86)     | 549 (0.65)     | 744 (0.74)     |
|                            | Gay                          | 708 (0.32)         | 94 (0.49)         | 98 (0.58)      | 212 (0.25)     | 304 (0.30)     |
|                            | Heterosexual                 | 57 065 (25.82)     | 4703 (24.45)      | 3744 (22.34)   | 24 402 (29.07) | 24 216 (23.95) |
|                            | Lesbian                      | 485 (0.22)         | 45 (0.23)         | 25 (0.15)      | 199 (0.24)     | 216 (0.21)     |
|                            | Queer                        | 323 (0.15)         | 14 (0.07)         | 20 (0.12)      | 77 (0.09)      | 212 (0.21)     |
|                            | Two-Spirit                   | 128 (0.06)         | 40 (0.21)         | 40 (0.24)      | 21 (0.03)      | 27 (0.03)      |
|                            | Other                        | 246 (0.11)         | 21 (0.11)         | 13 (0.08)      | 122 (0.15)     | 90 (0.09)      |
|                            | Do not know                  | 924 (0.42)         | 113 (0.59)        | 88 (0.53)      | 372 (0.44)     | 351 (0.35)     |
|                            | Prefer not to answer         | 7561 (3.42)        | 565 (2.94)        | 312 (1.86)     | 3513 (4.19)    | 3171 (3.14)    |
|                            | Missing                      | 152 029<br>(68.78) | 13501 (70.18)     | 12 277 (73.25) | 54 468 (64.89) | 71 783 (70.99) |
| Highest Level of Education | Post-secondary or equivalent | 84 888 (38.40)     | 6463 (33.60)      | 5593 (33.37)   | 29 300 (34.91) | 43 532 (43.05) |
|                            | Secondary or equivalent      | 61 831 (27.97)     | 6656 (34.60)      | 5127 (30.59)   | 25 961 (30.93) | 24 087 (23.82) |
|                            | Less than high school        | 18 941 (8.57)      | 1886 (9.80)       | 1380 (8.23)    | 8732 (10.40)   | 6943 (6.87)    |
|                            | Other                        | 8507 (3.85)        | 384 (2.00)        | 335 (2.00)     | 3694 (4.40)    | 4094 (4.05)    |
|                            | Do not know                  | 4860 (2.20)        | 734 (3.82)        | 584 (3.48)     | 1616 (1.93)    | 1926 (1.90)    |
|                            | Prefer not to answer         | 2950 (1.33)        | 273 (1.42)        | 149 (0.89)     | 1312 (1.56)    | 1216 (1.20)    |
|                            | Missing                      | 39 070 (17.67)     | 2841 (14.77)      | 3593 (21.44)   | 13 320 (15.87) | 19 316 (19.10) |
| Primary Language           | English                      | 167 163<br>(75.62) | 17 036<br>(88.56) | 14 622 (87.24) | 62 563 (74.54) | 72 942 (72.14) |
|                            | French                       | 22 547 (10.20)     | 554 (2.88)        | 390 (2.33)     | 10 537 (12.55) | 11 066 (10.94) |
|                            | Other                        | 26 847 (12.15)     | 1473 (7.66)       | 1475 (8.80)    | 9237 (11.00)   | 14 662 (14.50) |
|                            | Missing                      | 4490 (2.03)        | 174 (0.90)        | 274 (1.63)     | 1598 (1.90)    | 2444 (2.42)    |
| Race and Ethnicity         | Black                        | 8861 (4.01)        | 337 (1.75)        | 388 (2.31)     | 3420 (4.07)    | 4716 (4.66)    |
|                            | East/SouthEast Asian         | 3739 (1.69)        | 248 (1.29)        | 236 (1.41)     | 1297 (1.55)    | 1958 (1.94)    |
|                            | Indigenous                   | 2944 (1.33)        | 838 (4.36)        | 739 (4.41)     | 803 (0.96)     | 564 (0.56)     |
|                            | Latino                       | 4350 (1.97)        | 102 (0.53)        | 104 (0.62)     | 1606 (1.91)    | 2538 (2.51)    |
|                            | Middle Eastern               | 2046 (0.93)        | 149 (0.77)        | 195 (1.16)     | 689 (0.82)     | 1013 (1.00)    |



|                               |                                   |                    |                   |                |                |                |
|-------------------------------|-----------------------------------|--------------------|-------------------|----------------|----------------|----------------|
|                               | Other                             | 567 (0.26)         | 79 (0.41)         | 69 (0.41)      | 227 (0.27)     | 192 (0.19)     |
|                               | South Asian                       | 3597 (1.63)        | 232 (1.21)        | 91 (0.54)      | 1620 (1.93)    | 1654 (1.64)    |
|                               | White                             | 38 464 (17.40)     | 2661 (13.83)      | 1870 (11.16)   | 18 843 (22.45) | 15 090 (14.92) |
|                               | Do not know                       | 838 (0.38)         | 91 (0.47)         | 60 (0.36)      | 396 (0.47)     | 291 (0.29)     |
|                               | Prefer not to answer              | 2649 (1.20)        | 165 (0.86)        | 96 (0.57)      | 1348 (1.61)    | 1040 (1.03)    |
|                               | Missing                           | 152 992<br>(69.21) | 14 335<br>(74.52) | 12 913 (77.04) | 53 686 (63.96) | 72 058 (71.26) |
| Years Since Arrival in Canada | 0 to 5 years                      | 13 654 (6.18)      | 315 (1.64)        | 876 (5.23)     | 2732 (3.25)    | 9731 (9.62)    |
|                               | 6+ years                          | 51 815 (23.44)     | 2863 (14.88)      | 2077 (12.39)   | 19 859 (23.66) | 27 016 (26.72) |
|                               | None recorded                     | 155 578<br>(70.38) | 16 059<br>(83.48) | 13 808 (82.38) | 61 344 (73.09) | 64 367 (63.66) |
| Household Income              | \$0 to \$14,999                   | 40 519 (18.33)     | 4476 (23.27)      | 4253 (25.37)   | 13 281 (15.82) | 18 509 (18.31) |
|                               | \$15,000 to \$24,999              | 21 102 (9.55)      | 2095 (10.89)      | 1460 (8.71)    | 8986 (10.71)   | 8561 (8.47)    |
|                               | \$25,000 to \$39,999              | 20 877 (9.44)      | 1772 (9.21)       | 1216 (7.25)    | 8964 (10.68)   | 8925 (8.83)    |
|                               | \$40,000 to \$59,999              | 17 245 (7.80)      | 1455 (7.56)       | 966 (5.76)     | 7216 (8.60)    | 7608 (7.52)    |
|                               | \$60,000 or more                  | 28 494 (12.89)     | 2092 (10.87)      | 1770 (10.56)   | 10 776 (12.84) | 13 856 (13.7)  |
|                               | Do not know                       | 15 408 (6.97)      | 1301 (6.76)       | 1357 (8.10)    | 4963 (5.91)    | 7787 (7.70)    |
|                               | Prefer not to answer              | 27 621 (12.50)     | 2437 (12.67)      | 1693 (10.10)   | 12 453 (14.84) | 11 038 (10.92) |
|                               | Missing                           | 49 781 (22.52)     | 3609 (18.76)      | 4046 (24.14)   | 17 296 (20.61) | 24 830 (24.56) |
| Household Composition         | Couple with children              | 53 398 (24.16)     | 3280 (17.05)      | 3479 (20.76)   | 17 433 (20.77) | 29 206 (28.88) |
|                               | Couple without child              | 39 664 (17.94)     | 3907 (20.31)      | 2038 (12.16)   | 19 043 (22.69) | 14 676 (14.51) |
|                               | Extended family                   | 7632 (3.45)        | 578 (3.00)        | 545 (3.25)     | 3003 (3.58)    | 3506 (3.47)    |
|                               | Grandparents with grandchild(ren) | 1746 (0.79)        | 187 (0.97)        | 60 (0.36)      | 996 (1.19)     | 503 (0.50)     |
|                               | Siblings                          | 1622 (0.73)        | 140 (0.73)        | 110 (0.66)     | 529 (0.63)     | 843 (0.83)     |
|                               | Single parent                     | 14 445 (6.53)      | 1344 (6.99)       | 1183 (7.06)    | 5004 (5.96)    | 6914 (6.84)    |
|                               | Sole member                       | 32 782 (14.83)     | 4503 (23.41)      | 2942 (17.55)   | 14 094 (16.79) | 11 243 (11.12) |
|                               | Unrelated housemates              | 8622 (3.90)        | 669 (3.48)        | 898 (5.36)     | 2180 (2.60)    | 4875 (4.82)    |
|                               | Other                             | 8913 (4.03)        | 788 (4.10)        | 688 (4.10)     | 3414 (4.07)    | 4023 (3.98)    |
|                               | Do not know                       | 2475 (1.12)        | 301 (1.56)        | 342 (2.04)     | 978 (1.17)     | 854 (0.84)     |
|                               | Prefer not to answer              | 3727 (1.69)        | 262 (1.36)        | 229 (1.37)     | 1665 (1.98)    | 1571 (1.55)    |

|                  |         |                 |               |                |                |                |
|------------------|---------|-----------------|---------------|----------------|----------------|----------------|
|                  | Missing | 46 021 (20.82)  | 3278 (17.04)  | 4247 (25.34)   | 15 596 (18.58) | 22 900 (22.65) |
| Stable Residence | True    | 199 349 (90.18) | 14813 (77.00) | 13 414 (80.03) | 75 666 (90.15) | 95 456 (94.40) |
| Food Insecurity  | True    | 10 985 (4.97)   | 2066 (10.74)  | 881 (5.26)     | 5257 (6.26)    | 2781 (2.75)    |

676 *Legend:* CHC = Community Health Centre; MM = Multimorbidity; UAR = Urban at Risk.

677  
678  
679 **Table S3: Health care use characteristics**

| Measure                 | Value            | All Clients     | UAR CHC           | Rural CHC         | Multimorbidity    |
|-------------------------|------------------|-----------------|-------------------|-------------------|-------------------|
| # Years of Observation  | Min, Median, Max | (1, 5, 11)      | (1, 6, 11)        | (1, 7, 11)        | (1, 8, 11)        |
|                         | Mean (SD)        | 5.6 (3.7)       | 6.1 (3.8)         | 6.7 (3.6)         | 7.4 (3.3)         |
| 11 Years of Observation | n (%)            | 36 724 (16.6)   | 7976 (22.2)       | 5374 (25)         | 29 062 (28.2)     |
| # Provider Types Seen   | Min, Median, Max | (0, 4, 19)      | (0, 5, 19)        | (0, 5, 14)        | (0, 6, 19)        |
|                         | Mean (SD)        | 4.5 (2.3)       | 5.1 (2.6)         | 4.8 (2.1)         | 5.8 (2.2)         |
| # Internal Referrals    | Min, Median, Max | (0, 0, 300)     | (0, 1, 300)       | (0, 0, 51)        | (0, 1, 300)       |
|                         | Mean (SD)        | 1.7 (4.3)       | 2.8 (7.0)         | 1.4 (2.8)         | 2.8 (5.7)         |
| # External Referrals    | Min, Median, Max | (0, 1, 309)     | (0, 2, 309)       | (0, 1, 46)        | (0, 3, 309)       |
|                         | Mean (SD)        | 2.9 (4.5)       | 3.8 (5.9)         | 2.5 (3.2)         | 4.8 (5.5)         |
| Avg. # Days/Year        | Min, Median, Max | (0.2, 6, 176.9) | (0.2, 6.9, 129.7) | (0.2, 6.2, 120.3) | (0.3, 9.2, 176.9) |
|                         | Mean (SD)        | 8 (7.4)         | 9.4 (8.9)         | 8 (6.7)           | 11.4 (8.4)        |
| Max # Days/Year         | Min, Median, Max | (1, 10, 349)    | (1, 12, 245)      | (1, 11, 349)      | (1, 17, 349)      |
|                         | Mean (SD)        | 13.7 (13)       | 16.8 (16.6)       | 14.2 (12.1)       | 20.3 (14.4)       |
| Avg. # Events/Day       | Min, Median, Max | (1, 1.2, 66)    | (1, 1.2, 29)      | (1, 1.2, 31)      | (1, 1.2, 31)      |
|                         | Mean (SD)        | 1.3 (0.5)       | 1.3 (0.3)         | 1.3 (0.3)         | 1.3 (0.3)         |
| Max # Events/Day        | Min, Median, Max | (1, 3, 635)     | (1, 3, 635)       | (1, 3, 224)       | (1, 3, 635)       |
|                         | Mean (SD)        | 3.9 (7.8)       | 4.1 (8.2)         | 3.8 (6.1)         | 5.5 (10.7)        |

680  
681 *Legend:* # = Number; Avg. = Average; CHC = Community Health Centre; SD = Standard Deviation; UAR = Urban at Risk.

682

683

684 **Table S4: Provider type counts**

| Type                      | Provider Type                                 | Number of Events | % of Events |
|---------------------------|-----------------------------------------------|------------------|-------------|
| Provider Involved in Care | Physician                                     | 3 693 760        | 30.1        |
|                           | Nurse Practitioner (RN-EC)                    | 2 608 238        | 21.3        |
|                           | Nurse                                         | 2 475 621        | 20.2        |
|                           | Registered Practical Nurse (RPN)              | 990 144          | 8.1         |
|                           | Social worker                                 | 452 641          | 3.7         |
|                           | Other/Unknown/Undefined                       | 448 761          | 3.7         |
|                           | Dietitian/Nutritionist                        | 268 395          | 2.2         |
|                           | Chiropodist                                   | 259 101          | 2.1         |
|                           | Counselor                                     | 212 799          | 1.7         |
|                           | Physiotherapist                               | 171 291          | 1.4         |
| Internal Referral         | Other/Unknown/Undefined                       | 100 649          | 26.7        |
|                           | Physician                                     | 73 070           | 19.4        |
|                           | Nurse Practitioner (RN-EC)                    | 37 333           | 9.9         |
|                           | Dietitian/Nutritionist                        | 30 670           | 8.1         |
|                           | Nurse                                         | 29 326           | 7.8         |
|                           | Social worker                                 | 28 357           | 7.5         |
|                           | Physiotherapist                               | 11 210           | 3.0         |
|                           | Chiropractor                                  | 9881             | 2.6         |
|                           | Chiropodist                                   | 9741             | 2.6         |
|                           | Counselor                                     | 6068             | 1.6         |
| External Referral         | Other/Unknown/Undefined                       | 183 804          | 28.5        |
|                           | Dermatologist                                 | 41 388           | 6.4         |
|                           | Surgeon - general                             | 40 736           | 6.3         |
|                           | Gastroenterologist                            | 33 737           | 5.2         |
|                           | Surgeon - specialty (eye, heart, brain, etc.) | 29 370           | 4.6         |
|                           | Physiotherapist                               | 27 639           | 4.3         |
|                           | Ear Nose Throat (E.N.T.) specialist           | 25 791           | 4.0         |
|                           | Urologist                                     | 22 546           | 3.5         |

Gynecologist 21 701 3.4  
 Cardiologist 20 592 3.2

685  
686  
687  
688

**Table S5: Time series clustering of care access frequency**

| Analysis           | # Clusters (Silhouette Score) | Cluster ID         | # Clients | % Clients | Medoid         |
|--------------------|-------------------------------|--------------------|-----------|-----------|----------------|
| Short Term by Year | K = 2 (SS = 0.502)            | 1                  | 11 552    | 30.5      | 20, 8          |
|                    |                               | 2                  | 26 368    | 69.5      | 6, 2           |
|                    | K = 3 (SS = 0.301)            | 1                  | 15 067    | 39.7      | 12, 3          |
|                    |                               | 2                  | 16 791    | 44.3      | 4, 1           |
|                    |                               | 3                  | 6062      | 16.0      | 24, 9          |
|                    | K = 4 (SS = 0.142)            | 1                  | 12 931    | 34.1      | 5, 1           |
|                    |                               | 2                  | 13 063    | 34.4      | 12, 3          |
|                    |                               | 3                  | 5602      | 14.8      | 1, 2           |
|                    |                               | 4                  | 6324      | 16.7      | 25, 8          |
|                    | K = 5 (SS = 0.211)            | 1                  | 3639      | 9.6       | 31, 8          |
|                    |                               | 2                  | 11 533    | 30.4      | 8, 1           |
|                    |                               | 3                  | 11 155    | 29.4      | 3, 2           |
|                    |                               | 4                  | 7722      | 20.4      | 12, 5          |
|                    |                               | 5                  | 3871      | 10.2      | 17, 11         |
|                    | Short Term by Quarter         | K = 2 (SS = 0.541) | 1         | 6068      | 16.0           |
| 2                  |                               |                    | 31 852    | 84.0      | 3, 1, 0, 1, 2  |
| K = 3 (SS = 0.249) |                               | 1                  | 10 780    | 28.4      | 6, 3, 1, 2, 1  |
|                    |                               | 2                  | 20 431    | 53.9      | 2, 0, 0, 0, 1  |
|                    |                               | 3                  | 6709      | 17.7      | 6, 1, 3, 4, 3  |
| K = 4 (SS = 0.044) |                               | 1                  | 14 389    | 37.9      | 3, 0, 1, 1, 1  |
|                    |                               | 2                  | 8939      | 23.6      | 6, 1, 0, 1, 2  |
|                    |                               | 3                  | 9072      | 23.9      | 2, 1, 0, 1, 2  |
|                    |                               | 4                  | 5520      | 14.6      | 9, 4, 2, 5, 3  |
| K = 5 (SS = 0.121) |                               | 1                  | 4163      | 11.0      | 11, 8, 4, 5, 2 |

|                      |                    |                    |        |                                                                                                        |                                                                                             |                                                                                          |
|----------------------|--------------------|--------------------|--------|--------------------------------------------------------------------------------------------------------|---------------------------------------------------------------------------------------------|------------------------------------------------------------------------------------------|
|                      |                    | 2                  | 7084   | 18.7                                                                                                   | 3, 1, 0, 4, 1                                                                               |                                                                                          |
|                      |                    | 3                  | 17 282 | 45.6                                                                                                   | 3, 1, 0, 1, 2                                                                               |                                                                                          |
|                      |                    | 4                  | 6111   | 16.1                                                                                                   | 5, 2, 1, 0, 1                                                                               |                                                                                          |
|                      |                    | 5                  | 3280   | 8.6                                                                                                    | 6, 0, 1, 6, 1                                                                               |                                                                                          |
| Long Term by Year    | K = 2 (SS = 0.553) | 1                  | 34 265 | 80.0                                                                                                   | 8, 3, 3, 2, 0, 1, 2, 6                                                                      |                                                                                          |
|                      |                    | 2                  | 8590   | 20.0                                                                                                   | 15, 24, 20, 19, 20, 27, 23, 11                                                              |                                                                                          |
|                      | K = 3 (SS = 0.149) | 1                  | 15 831 | 36.9                                                                                                   | 9, 4, 8, 3, 3, 2, 5, 2                                                                      |                                                                                          |
|                      |                    | 2                  | 10 557 | 24.6                                                                                                   | 24, 9, 13, 19, 12, 12, 16, 6                                                                |                                                                                          |
|                      |                    | 3                  | 16 467 | 38.4                                                                                                   | 4, 0, 0, 1, 0, 0, 1, 4                                                                      |                                                                                          |
|                      | K = 4 (SS = 0.155) | 1                  | 2402   | 5.6                                                                                                    | 18, 35, 34, 46, 34, 39, 27, 9                                                               |                                                                                          |
|                      |                    | 2                  | 23 637 | 55.2                                                                                                   | 8, 3, 2, 2, 4, 1, 2, 3                                                                      |                                                                                          |
|                      |                    | 3                  | 8440   | 19.7                                                                                                   | 5, 0, 0, 0, 0, 1, 13, 3                                                                     |                                                                                          |
|                      |                    | 4                  | 8376   | 19.5                                                                                                   | 20, 8, 10, 12, 16, 11, 19, 9                                                                |                                                                                          |
|                      |                    | 5                  | 15 513 | 36.2                                                                                                   | 3, 0, 0, 0, 0, 1, 5, 2                                                                      |                                                                                          |
| Long Term by Quarter | K = 5 (SS = 0.136) | 1                  | 6206   | 14.5                                                                                                   | 17, 7, 1, 1, 2, 2, 4, 2                                                                     |                                                                                          |
|                      |                    | 2                  | 5166   | 12.1                                                                                                   | 9, 13, 11, 11, 15, 21, 22, 9                                                                |                                                                                          |
|                      |                    | 3                  | 4716   | 11.0                                                                                                   | 27, 16, 11, 7, 10, 10, 13, 5                                                                |                                                                                          |
|                      |                    | 4                  | 11 254 | 26.3                                                                                                   | 6, 2, 6, 6, 7, 7, 12, 3                                                                     |                                                                                          |
|                      |                    | 5                  | 15 513 | 36.2                                                                                                   | 3, 0, 0, 0, 0, 1, 5, 2                                                                      |                                                                                          |
|                      | K = 2 (SS = 0.536) | 1                  | 36 775 | 85.8                                                                                                   | 4, 1, 0, 2, 0, 0, 0, 0, 0, 1, 4, 0, 0, 0, 0, 1, 2, 0, 0, 0, 0, 0, 0, 0, 0, 0, 0, 0, 1, 0, 2 |                                                                                          |
|                      |                    | 2                  | 6080   | 14.2                                                                                                   | 7, 1, 6, 2, 3, 10, 6, 4, 5, 6, 5, 5, 2, 4, 4, 7, 6, 4, 5, 3, 5, 4, 7, 6, 9, 11, 6, 8, 3, 4  |                                                                                          |
|                      |                    | K = 3 (SS = 0.007) | 1      | 16 528                                                                                                 | 38.6                                                                                        | 1, 0, 5, 0, 1, 2, 0, 0, 0, 3, 0, 0, 0, 0, 0, 0, 0, 0, 0, 0, 0, 0, 0, 0, 1, 0, 1          |
|                      |                    |                    | 2      | 9729                                                                                                   | 22.7                                                                                        | 5, 3, 1, 1, 1, 3, 2, 1, 3, 3, 8, 3, 1, 1, 2, 1, 1, 1, 0, 0, 1, 1, 1, 0, 1, 3, 4, 7, 2    |
|                      |                    |                    | 3      | 16 598                                                                                                 | 38.7                                                                                        | 3, 0, 1, 0, 0, 0, 0, 0, 2, 0, 0, 0, 0, 0, 0, 0, 0, 0, 0, 0, 0, 0, 0, 0, 1, 3, 0, 1, 1, 4 |
| K = 4 (SS = 0.236)   | 1                  | 998                | 2.3    | 7, 0, 3, 4, 1, 2, 2, 1, 1, 1, 1, 1, 1, 0, 1, 2, 1, 1, 0, 2, 2, 1, 6, 2, 3, 9, 20, 10, 13, 9, 12, 13, 2 |                                                                                             |                                                                                          |
|                      | 2                  | 26 775             | 62.5   | 3, 0, 1, 0, 2, 0, 0, 0, 1, 2, 0, 0, 0, 0, 0, 0, 0, 0, 0, 0, 0, 0, 0, 0, 0, 0, 2, 1, 1, 0, 1            |                                                                                             |                                                                                          |

|                     |   |        |      |                                                                                                                              |
|---------------------|---|--------|------|------------------------------------------------------------------------------------------------------------------------------|
|                     | 3 | 10 169 | 23.7 | 3, 2, 0, 0, 4, 0, 0, 0, 0, 1, 0, 0, 0, 0, 0, 0, 0, 0, 0, 0, 0, 0, 0, 0, 0, 0, 0, 0, 0, 0, 0, 0, 0, 0, 1, 6, 2, 4, 2, 5, 1, 2 |
|                     | 4 | 4913   | 11.5 | 8, 5, 4, 3, 3, 2, 3, 4, 2, 4, 6, 4, 5, 4, 4, 5, 3, 7, 5, 4, 5, 4, 3, 3, 2, 4, 2, 7, 3                                        |
| K = 5 (SS = -0.031) | 1 | 11 624 | 27.1 | 3, 2, 0, 1, 0, 0, 0, 0, 0, 0, 0, 0, 0, 0, 0, 0, 0, 1, 0, 0, 0, 0, 2, 1, 0, 1, 0, 0, 0, 3, 1                                  |
|                     | 2 | 6981   | 16.3 | 2, 0, 0, 0, 0, 1, 0, 0, 0, 0, 0, 0, 0, 0, 0, 0, 0, 0, 0, 0, 0, 0, 0, 0, 0, 0, 0, 0, 0, 0, 0, 5, 3, 0, 1, 0, 1, 0, 0, 0, 2, 1 |
|                     | 3 | 6448   | 15.0 | 6, 8, 3, 1, 1, 2, 3, 3, 3, 2, 6, 4, 1, 1, 3, 1, 2, 2, 0, 2, 2, 1, 2, 2, 3, 2, 2, 1, 2                                        |
|                     | 4 | 5840   | 13.6 | 4, 3, 0, 0, 3, 0, 0, 0, 0, 0, 0, 0, 0, 0, 0, 0, 0, 0, 0, 0, 0, 0, 0, 0, 0, 0, 0, 0, 0, 0, 0, 3, 0, 0, 2, 4, 9, 5, 2          |
|                     | 5 | 11 962 | 27.9 | 2, 0, 2, 0, 0, 0, 0, 0, 0, 0, 0, 1, 0, 0, 0, 0, 0, 3, 0, 0, 0, 0, 0, 0, 0, 0, 1, 0, 2, 0, 0, 1, 0, 0, 0, 1                   |

689

690 *Notes:* Short-term cohort includes clients with 2-3 years of observation; long-term cohort includes clients with 8-10 years of observation. Year represents  
691 consecutive 365.25 day intervals; quarter-year represents consecutive 90.30 day intervals. Medoids are the time series of a real client, and represent the “middle”  
692 time series for a cluster, i.e. selected to minimize within- and maximize between-cluster distance. *Legend:* SS = Silhouette Score. K represents the number of  
693 clusters allowed to explain the data.

694

695

696

#### Eleven-year period prevalence technical details:

697 Since not all clients receive care from CHCs 2009-2019, they are not all at-risk of condition indications in their electronic health record for the entire calendar-  
698 based period of observation. Thus, the denominator requires estimation of the average or mid-point size of the population. This is challenging given that primary  
699 care electronic health records represent an open cohort with no standard expectation for frequency of care, and the overall number of clients receiving care  
700 increases across calendar time (see Supplementary Figure 1). We used the following process to calculate 11-year period prevalence:

701

Numerator: number of clients with at least one relevant code at any point from 2009 through 2019.

702 Denominator: First, we calculated the median number of calendar-based years of observation across all eligible clients (i.e., median number of “at-risk” years): 5  
703 years. Second, we calculated the number of clients who received any type of care at least once in each of the seven possible five-year intervals (2009-13; 2010-  
704 14; 2011-15; 2012-16; 2013-17; 2014-18; 2015-19), representing the size of the population within each of those five-year intervals. Finally, the median size of  
705 those seven cohorts was used as the denominator, representing the overall average size of the population across 11 years.

706

The same process was followed to get estimates for the entire eligible population and for the subset of clients who receive care from urban at risk community  
707 health centres.

708

709
